# Supplementary material
Source: PubMed Central journal article supplement (PMC5330701)
Supplement: supp_the2016-0194_onco12016-sup-0001-suppinfo1.pdf [file supp_the2016-0194_onco12016-sup-0001-suppinfo1.pdf]

Supplemental Tables for:  
Oncogenic ALK Fusion and RRAS Mutation in KRAS mutation-negative Pancreatic Ductal Adenocarcinoma  
Takashi Kohno et al.

**Table S1. Clinicopathological characteristics of the 100 patients**

| Characteristics                 |                               | Patients<br>(n = 100) |
|---------------------------------|-------------------------------|-----------------------|
| Age - year                      | Median                        | 67                    |
|                                 | Range                         | 38-84                 |
| Sex - No. (%)                   | Male                          | 59 (59%)              |
|                                 | Female                        | 41 (41%)              |
| p-Stage <sup>a</sup> - No. (%)  | IA                            | 1 (1%)                |
|                                 | IB                            | 0 (0%)                |
|                                 | IIA                           | 25 (25%)              |
|                                 | IIB                           | 64 (64%)              |
|                                 | III                           | 0 (0%)                |
| Tumor differentiation - No. (%) | IV                            | 10 (10%)              |
|                                 | Tubular adenocarcinoma – well | 6 (6%)                |
|                                 | – Moderate                    | 64 (64%)              |
|                                 | – Poor                        | 28 (28%)              |
|                                 | Adenosquamous carcinoma       | 2 (2%)                |
| Tumor location - No. (%)        | Head                          | 62 (62%)              |
|                                 | Body/Tail                     | 38 (38%)              |

<sup>a</sup> UICC TNM classification of malignant tumors. 7th edition.

Supplemental Tables for:

Oncogenic ALK Fusion and RRAS Mutation in KRAS mutation-negative Pancreatic Ductal Adenocarcinoma

Takashi Kohno et al.

**Supplementary Table S2. Nonsynonymous somatic mutations in PDACs without KRAS mutation**

| No. | Sample | Gene name | Transcript ID | Nucleotide change | Amino acid change |
|-----|--------|-----------|---------------|-------------------|-------------------|
| 1   | P030T  | VWA5B1    | NM_001039500  | c.G3402T          | p.E1134D          |
| 2   | P030T  | NCDN      | NM_001014841  | c.G1317A          | p.W439X           |
| 3   | P030T  | GREB1     | NM_014668     | c.C2192T          | p.T731M           |
| 4   | P030T  | HOXD1     | NM_024501     | c.G58A            | p.V20M            |
| 5   | P030T  | DYTN      | NM_001093730  | c.C1129T          | p.R377W           |
| 6   | P030T  | MAP2      | NM_002374     | c.G2725T          | p.A909S           |
| 7   | P030T  | ABCA12    | NM_015657     | c.A515G           | p.H172R           |
| 8   | P030T  | DOCK10    | NM_014689     | c.G5884A          | p.E1962K          |
| 9   | P030T  | BSN       | NM_003458     | c.G3578A          | p.R1193H          |
| 10  | P030T  | ATR       | NM_001184     | c.T2668G          | p.L890V           |
| 11  | P030T  | WDFY3     | NM_014991     | c.G5839A          | p.V1947M          |
| 12  | P030T  | NPR3      | NM_000908     | c.G803A           | p.R268Q           |
| 13  | P030T  | TMEM171   | NM_001161342  | c.G589A           | p.E197K           |
| 14  | P030T  | PCDHA9    | NM_014005     | c.C1243G          | p.R415G           |
| 15  | P030T  | KIF4B     | NM_001099293  | c.G767A           | p.R256H           |
| 16  | P030T  | ZNF454    | NM_001178089  | c.G338T           | p.R113I           |
| 17  | P030T  | SAMD9L    | NM_152703     | c.G209A           | p.R70H            |
| 18  | P030T  | CAPZA2    | NM_006136     | c.C409T           | p.P137S           |
| 19  | P030T  | GRM8      | NM_001127323  | c.G2711A          | p.S904N           |
| 20  | P030T  | ADCY8     | NM_001115     | c.G1537A          | p.G513S           |
| 21  | P030T  | EEF1D     | NM_001130053  | c.G377A           | p.R126H           |
| 22  | P030T  | CELF2     | NM_001025076  | c.G422A           | p.R141Q           |
| 23  | P030T  | AP3M1     | NM_012095     | c.A373G           | p.T125A           |
| 24  | P030T  | HECTD2    | NM_182765     | c.T1617G          | p.S539R           |
| 25  | P030T  | NRAP      | NM_006175     | c.C4497G          | p.I1499M          |
| 26  | P030T  | C12orf56  | NM_001170633  | c.G495T           | p.Q165H           |
| 27  | P030T  | NOS1      | NM_001204213  | c.G2902A          | p.A968T           |
| 28  | P030T  | HCAR2     | NM_177551     | c.G1048A          | p.G350S           |
| 29  | P030T  | GJA3      | NM_021954     | c.T1075C          | p.S359P           |
| 30  | P030T  | SUPT16H   | NM_007192     | c.G1706T          | p.R569L           |
| 31  | P030T  | SLC6A2    | NM_001043     | c.G77A            | p.R26Q            |
| 32  | P030T  | ZFH3      | NM_001164766  | c.C4081T          | p.L1361F          |
| 33  | P030T  | TAF1C     | NM_001243158  | c.C478T           | p.R160X           |
| 34  | P030T  | TP53      | NM_001126115  | c.G422A           | p.R141H           |
| 35  | P030T  | ZNF358    | NM_018083     | c.A215G           | p.D72G            |
| 36  | P030T  | LGALS4    | NM_006149     | c.C124G           | p.H42D            |

Supplemental Tables for:  
Oncogenic ALK Fusion and RRAS Mutation in KRAS mutation-negative Pancreatic Ductal Adenocarcinoma  
Takashi Kohno et al.

|    |       |            |              |           |          |
|----|-------|------------|--------------|-----------|----------|
| 37 | P030T | LGALS4     | NM_006149    | c.C95G    | p.S32C   |
| 38 | P030T | FBL        | NM_001436    | c.G545A   | p.G182D  |
| 39 | P030T | RRAS       | NM_006270    | c.A260T   | p.Q87L   |
| 40 | P030T | KLK3       | NM_001030047 | c.C386T   | p.P129L  |
| 41 | P030T | ZNF813     | NM_001004301 | c.C1396T  | p.R466C  |
| 42 | P030T | DSCR4      | NM_005867    | c.G133T   | p.E45X   |
| 43 | P030T | XIAP       | NM_001167    | c.A407G   | p.H136R  |
| 44 | P030T | ODZ1;TENM1 | NM_014253    | c.G4352A  | p.R1451H |
| 1  | P096T | SCNN1D     | NM_001130413 | c.A1574G  | p.H525R  |
| 2  | P096T | DVL1       | NM_004421    | c.C64T    | p.P22S   |
| 3  | P096T | ATAD3C     | NM_001039211 | c.C551T   | p.T184M  |
| 4  | P096T | PEX10      | NM_002617    | c.G799A   | p.V267I  |
| 5  | P096T | TP73       | NM_001126240 | c.G10A    | p.V4I    |
| 6  | P096T | DFFB       | NM_004402    | c.G307A   | p.A103T  |
| 7  | P096T | NPHP4      | NM_015102    | c.G2735A  | p.R912H  |
| 8  | P096T | NPHP4      | NM_015102    | c.G2281A  | p.G761R  |
| 9  | P096T | ACOT7      | NM_007274    | c.G223A   | p.A75T   |
| 10 | P096T | CAMTA1     | NM_015215    | c.T644C   | p.I215T  |
| 11 | P096T | CLSTN1     | NM_014944    | c.G2195A  | p.R732H  |
| 12 | P096T | KIF1B      | NM_015074    | c.G3815A  | p.R1272H |
| 13 | P096T | EXOSC10    | NM_001001998 | c.C1961T  | p.A654V  |
| 14 | P096T | EXOSC10    | NM_001001998 | c.C1180T  | p.R394C  |
| 15 | P096T | FBXO2      | NM_012168    | c.G109C   | p.E37Q   |
| 16 | P096T | CLCN6      | NM_001256959 | c.C2143T  | p.R715C  |
| 17 | P096T | PDPN       | NM_006474    | c.G128A   | p.R43H   |
| 18 | P096T | CLCNKB     | NM_000085    | c.C79A    | p.R27S   |
| 19 | P096T | FBXO42     | NM_018994    | c.C1816T  | p.P606S  |
| 20 | P096T | ALPL       | NM_001177520 | c.G367T   | p.G123C  |
| 21 | P096T | HSPG2      | NM_005529    | c.G11920A | p.G3974R |
| 22 | P096T | EPHA8      | NM_020526    | c.C2858T  | p.A953V  |
| 23 | P096T | SRRM1      | NM_005839    | c.C583T   | p.R195C  |
| 24 | P096T | PIGV       | NM_001202554 | c.C878T   | p.P293L  |
| 25 | P096T | ATPIF1     | NM_016311    | c.G45T    | p.W15C   |
| 26 | P096T | RCC1       | NM_001269    | c.G793A   | p.G265S  |
| 27 | P096T | BAI2       | NM_001703    | c.C205A   | p.L69M   |
| 28 | P096T | LCK        | NM_001042771 | c.C1292T  | p.T431M  |
| 29 | P096T | HDAC1      | NM_004964    | c.G146A   | p.R49Q   |
| 30 | P096T | PHC2       | NM_198040    | c.C1541T  | p.P514L  |
| 31 | P096T | CSMD2      | NM_052896    | c.C2434T  | p.R812W  |

Supplemental Tables for:

Oncogenic ALK Fusion and RRAS Mutation in KRAS mutation-negative Pancreatic Ductal Adenocarcinoma

Takashi Kohno et al.

|    |       |         |              |          |          |
|----|-------|---------|--------------|----------|----------|
| 32 | P096T | MAP7D1  | NM_018067    | c.C2080T | p.R694W  |
| 33 | P096T | RRAGC   | NM_001271851 | c.G325A  | p.V109I  |
| 34 | P096T | KCNQ4   | NM_004700    | c.G754A  | p.A252T  |
| 35 | P096T | TIE1    | NM_001253357 | c.C1798A | p.P600T  |
| 36 | P096T | BEST4   | NM_153274    | c.G38A   | p.R13H   |
| 37 | P096T | NASP    | NM_001195193 | c.C20T   | p.A7V    |
| 38 | P096T | TMEM69  | NM_016486    | c.G325A  | p.V109I  |
| 39 | P096T | IPP     | NM_001145349 | c.G1139A | p.R380H  |
| 40 | P096T | CC2D1B  | NM_032449    | c.G1601A | p.R534Q  |
| 41 | P096T | CC2D1B  | NM_032449    | c.C1600T | p.R534W  |
| 42 | P096T | ORC1    | NM_001190818 | c.G217A  | p.E73K   |
| 43 | P096T | PODN    | NM_001199082 | c.C482T  | p.P161L  |
| 44 | P096T | PODN    | NM_001199082 | c.G1246A | p.G416R  |
| 45 | P096T | PCSK9   | NM_174936    | c.G235A  | p.V79M   |
| 46 | P096T | USP24   | NM_015306    | c.C3820T | p.R1274X |
| 47 | P096T | MYSM1   | NM_001085487 | c.C1495T | p.R499C  |
| 48 | P096T | ROR1    | NM_005012    | c.G1286A | p.R429Q  |
| 49 | P096T | LRRC7   | NM_020794    | c.G3326T | p.R1109M |
| 50 | P096T | CTH     | NM_001190463 | c.G973T  | p.A325S  |
| 51 | P096T | LPHN2   | NM_012302    | c.C2549A | p.A850D  |
| 52 | P096T | GFI1    | NM_001127215 | c.G913A  | p.V305M  |
| 53 | P096T | ATXN7L2 | NM_153340    | c.C1099A | p.P367T  |
| 54 | P096T | EPS8L3  | NM_024526    | c.A482C  | p.Q161P  |
| 55 | P096T | RBM15   | NM_001201545 | c.C1780T | p.R594X  |
| 56 | P096T | SLC16A1 | NM_001166496 | c.G257A  | p.R86H   |
| 57 | P096T | RSBN1   | NM_018364    | c.C1654T | p.R552X  |
| 58 | P096T | NOTCH2  | NM_001200001 | c.G2858A | p.C953Y  |
| 59 | P096T | PI4KB   | NM_001198775 | c.G1423A | p.G475S  |
| 60 | P096T | FLG     | NM_002016    | c.A8674G | p.S2892G |
| 61 | P096T | FLG     | NM_002016    | c.C6788T | p.A2263V |
| 62 | P096T | FLG     | NM_002016    | c.G6522T | p.Q2174H |
| 63 | P096T | CHTOP   | NM_001206612 | c.G509A  | p.R170H  |
| 64 | P096T | NPR1    | NM_000906    | c.G349A  | p.G117S  |
| 65 | P096T | UBAP2L  | NM_001127320 | c.A1421G | p.Q474R  |
| 66 | P096T | ADAR    | NM_001111    | c.G623C  | p.S208T  |
| 67 | P096T | TRIM46  | NM_001256599 | c.G377A  | p.R126Q  |
| 68 | P096T | RUSC1   | NM_001105205 | c.C1088T | p.T363I  |
| 69 | P096T | SMG5    | NM_015327    | c.C310T  | p.R104W  |
| 70 | P096T | APOA1BP | NM_144772    | c.A733C  | p.K245Q  |

Supplemental Tables for:

Oncogenic ALK Fusion and RRAS Mutation in KRAS mutation-negative Pancreatic Ductal Adenocarcinoma

Takashi Kohno et al.

|     |       |           |              |          |          |
|-----|-------|-----------|--------------|----------|----------|
| 71  | P096T | BCAN      | NM_021948    | c.G1768T | p.G590C  |
| 72  | P096T | ARHGEF11  | NM_014784    | c.C1759T | p.R587X  |
| 73  | P096T | CD1B      | NM_001764    | c.G700A  | p.V234M  |
| 74  | P096T | TSTD1     | NM_001113205 | c.A92C   | p.E31A   |
| 75  | P096T | FCGR3A    | NM_000569    | c.C404T  | p.P135L  |
| 76  | P096T | NOS1AP    | NM_001164757 | c.G457A  | p.V153I  |
| 77  | P096T | DUSP27    | NM_001080426 | c.G3082A | p.E1028K |
| 78  | P096T | SELL      | NM_000655    | c.G344T  | p.G115V  |
| 79  | P096T | DARS2     | NM_018122    | c.G173A  | p.R58H   |
| 80  | P096T | DARS2     | NM_018122    | c.C1825T | p.R609W  |
| 81  | P096T | FAM5B     | NM_021165    | c.G812A  | p.R271H  |
| 82  | P096T | TOR3A     | NM_022371    | c.G761A  | p.R254H  |
| 83  | P096T | AXDND1    | NM_144696    | c.G953A  | p.R318H  |
| 84  | P096T | TDRD5     | NM_001199092 | c.G1581A | p.W527X  |
| 85  | P096T | FAM163A   | NM_173509    | c.G358A  | p.E120K  |
| 86  | P096T | KIAA1614  | NM_020950    | c.C1000T | p.R334X  |
| 87  | P096T | CACNA1E   | NM_000721    | c.C20T   | p.A7V    |
| 88  | P096T | RNF2      | NM_007212    | c.C349T  | p.R117C  |
| 89  | P096T | HMCN1     | NM_031935    | c.C4112T | p.S1371L |
| 90  | P096T | HMCN1     | NM_031935    | c.G7868A | p.R2623H |
| 91  | P096T | CFHR3     | NM_001166624 | c.T428C  | p.V143A  |
| 92  | P096T | LAD1      | NM_005558    | c.C566T  | p.T189M  |
| 93  | P096T | OPTC      | NM_014359    | c.G250A  | p.A84T   |
| 94  | P096T | MFSD4     | NM_181644    | c.G418A  | p.V140I  |
| 95  | P096T | FAIM3     | NM_001142473 | c.C206T  | p.T69I   |
| 96  | P096T | NENF      | NM_013349    | c.C250T  | p.R84X   |
| 97  | P096T | C1orf227  | NM_001024601 | c.C262T  | p.H88Y   |
| 98  | P096T | KCTD3     | NM_016121    | c.C662T  | p.T221M  |
| 99  | P096T | TGFB2     | NM_001135599 | c.A311G  | p.Y104C  |
| 100 | P096T | MIA3      | NM_198551    | c.T5303A | p.V1768D |
| 101 | P096T | CAPN2     | NM_001146068 | c.G553A  | p.A185T  |
| 102 | P096T | ACBD3     | NM_022735    | c.C616T  | p.R206C  |
| 103 | P096T | OBSCN     | NM_001098623 | c.G2834A | p.R945H  |
| 104 | P096T | PCNXL2    | NM_014801    | c.C593A  | p.P198H  |
| 105 | P096T | RBM34     | NM_001161533 | c.C62A   | p.P21H   |
| 106 | P096T | RYR2      | NM_001035    | c.G3026A | p.R1009Q |
| 107 | P096T | OR2C3     | NM_198074    | c.G334A  | p.E112K  |
| 108 | P096T | PXDN      | NM_012293    | c.C3644T | p.P1215L |
| 109 | P096T | KIDINS220 | NM_020738    | c.C2072A | p.A691D  |

Supplemental Tables for:

Oncogenic ALK Fusion and RRAS Mutation in KRAS mutation-negative Pancreatic Ductal Adenocarcinoma

Takashi Kohno et al.

|     |       |                |              |           |          |
|-----|-------|----------------|--------------|-----------|----------|
| 110 | P096T | NTSR2          | NM_012344    | c.G869A   | p.R290H  |
| 111 | P096T | NTSR2          | NM_012344    | c.C250G   | p.L84V   |
| 112 | P096T | AGBL5          | NM_001035507 | c.C361T   | p.R121C  |
| 113 | P096T | PPM1G          | NM_177983    | c.C800T   | p.A267V  |
| 114 | P096T | IFT172         | NM_015662    | c.G1829A  | p.R610Q  |
| 115 | P096T | BIRC6          | NM_016252    | c.G7681A  | p.V2561I |
| 116 | P096T | PREPL          | NM_001042385 | c.G1969A  | p.E657K  |
| 117 | P096T | MSH6           | NM_000179    | c.A2074T  | p.K692X  |
| 118 | P096T | B3GNT2         | NM_006577    | c.C242T   | p.T81M   |
| 119 | P096T | ETAA1          | NM_019002    | c.A1057G  | p.T353A  |
| 120 | P096T | ANXA4          | NM_001153    | c.C427T   | p.R143C  |
| 121 | P096T | ACTG2          | NM_001199893 | c.G113A   | p.R38H   |
| 122 | P096T | DQX1           | NM_133637    | c.C1546T  | p.R516C  |
| 123 | P096T | DQX1           | NM_133637    | c.A590G   | p.D197G  |
| 124 | P096T | FER1L5         | NM_001113382 | c.T449C   | p.M150T  |
| 125 | P096T | FER1L5         | NM_001113382 | c.C2974T  | p.R992C  |
| 126 | P096T | ANKRD36        | NM_001164315 | c.C4823T  | p.T1608M |
| 127 | P096T | VWA3B          | NM_144992    | c.C3758T  | p.A1253V |
| 128 | P096T | RPL31          | NM_001098577 | c.G373A   | p.A125T  |
| 129 | P096T | MRPS9          | NM_182640    | c.G57T    | p.W19C   |
| 130 | P096T | RANBP2         | NM_006267    | c.A9187G  | p.N3063D |
| 131 | P096T | BUB1           | NM_004336    | c.G1470C  | p.W490C  |
| 132 | P096T | BCL2L11        | NM_001204108 | c.A325C   | p.S109R  |
| 133 | P096T | BCL2L11        | NM_001204106 | c.G256A   | p.E86K   |
| 134 | P096T | CNTNAP5        | NM_130773    | c.C1927T  | p.R643W  |
| 135 | P096T | PROC           | NM_000312    | c.C162A   | p.S54R   |
| 136 | P096T | MZT2B          | NM_025029    | c.A326G   | p.N109S  |
| 137 | P096T | MGAT5          | NM_002410    | c.G287A   | p.R96H   |
| 138 | P096T | MCM6           | NM_005915    | c.A636C   | p.Q212H  |
| 139 | P096T | NEB            | NM_004543    | c.G19870A | p.A6624T |
| 140 | P096T | FMNL2          | NM_052905    | c.T1142C  | p.L381P  |
| 141 | P096T | PKP4           | NM_001005476 | c.G1784A  | p.R595Q  |
| 142 | P096T | PLA2R1         | NM_001007267 | c.C1109T  | p.A370V  |
| 143 | P096T | ITGB6          | NM_000888    | c.G523A   | p.G175R  |
| 144 | P096T | XIRP2          | NM_001199144 | c.C2258T  | p.A753V  |
| 145 | P096T | LRP2           | NM_004525    | c.G6443A  | p.R2148Q |
| 146 | P096T | LRP2           | NM_004525    | c.G2540A  | p.R847H  |
| 147 | P096T | CDCA7          | NM_145810    | c.C997T   | p.R333W  |
| 148 | P096T | AC018470.1;SP9 | NM_001145250 | c.C1150T  | p.R384W  |

Supplemental Tables for:

Oncogenic ALK Fusion and RRAS Mutation in KRAS mutation-negative Pancreatic Ductal Adenocarcinoma

Takashi Kohno et al.

|     |       |          |              |           |           |
|-----|-------|----------|--------------|-----------|-----------|
| 149 | P096T | CHRNA1   | NM_000079    | c.G1346A  | p.R449Q   |
| 150 | P096T | TTN      | NM_003319    | c.G70810A | p.A23604T |
| 151 | P096T | TTN      | NM_003319    | c.C39599T | p.A13200V |
| 152 | P096T | TTN      | NM_003319    | c.G13907A | p.G4636D  |
| 153 | P096T | CCDC141  | NM_173648    | c.G4264A  | p.E1422K  |
| 154 | P096T | ZNF804A  | NM_194250    | c.C2795T  | p.T932I   |
| 155 | P096T | FSIP2    | NM_173651    | c.A16187G | p.D5396G  |
| 156 | P096T | MYO1B    | NM_001130158 | c.G2295T  | p.K765N   |
| 157 | P096T | DNAH7    | NM_018897    | c.C2851T  | p.R951X   |
| 158 | P096T | FAM117B  | NM_173511    | c.C1027T  | p.R343W   |
| 159 | P096T | ZDBF2    | NM_020923    | c.C6118T  | p.R2040W  |
| 160 | P096T | ADAM23   | NM_003812    | c.C218T   | p.P73L    |
| 161 | P096T | FN1      | NM_002026    | c.G665A   | p.R222H   |
| 162 | P096T | TNS1     | NM_022648    | c.C374T   | p.A125V   |
| 163 | P096T | SPEG     | NM_005876    | c.G7637A  | p.R2546H  |
| 164 | P096T | CHPF     | NM_001195731 | c.C1240T  | p.R414C   |
| 165 | P096T | TMEM198  | NM_001005209 | c.G818A   | p.R273Q   |
| 166 | P096T | OBSL1    | NM_001173431 | c.C4420T  | p.R1474X  |
| 167 | P096T | SERPINE2 | NM_001136528 | c.C679T   | p.R227W   |
| 168 | P096T | COL4A3   | NM_000091    | c.G861T   | p.K287N   |
| 169 | P096T | SPHKAP   | NM_001142644 | c.G2572A  | p.E858K   |
| 170 | P096T | TRIP12   | NM_004238    | c.G4772A  | p.R1591H  |
| 171 | P096T | SP100    | NM_001080391 | c.G2152A  | p.D718N   |
| 172 | P096T | ARMC9    | NM_025139    | c.C1021T  | p.R341C   |
| 173 | P096T | NCL      | NM_005381    | c.G1649A  | p.G550D   |
| 174 | P096T | ECEL1    | NM_004826    | c.G727A   | p.A243T   |
| 175 | P096T | GIGYF2   | NM_001103148 | c.G322C   | p.G108R   |
| 176 | P096T | ATG16L1  | NM_001190266 | c.C211A   | p.L71I    |
| 177 | P096T | ATG16L1  | NM_198890    | c.G683A   | p.R228Q   |
| 178 | P096T | TRPM8    | NM_024080    | c.G1424A  | p.R475H   |
| 179 | P096T | IQCA1    | NM_001270584 | c.C655T   | p.R219X   |
| 180 | P096T | IQCA1    | NM_001270584 | c.A182C   | p.D61A    |
| 181 | P096T | SNED1    | NM_001080437 | c.G335A   | p.R112H   |
| 182 | P096T | BOK      | NM_032515    | c.G403A   | p.V135M   |
| 183 | P096T | CNTN4    | NM_001206956 | c.T293C   | p.V98A    |
| 184 | P096T | CRBN     | NM_001173482 | c.A311G   | p.Q104R   |
| 185 | P096T | LRRN1    | NM_020873    | c.G1553T  | p.G518V   |
| 186 | P096T | SETD5    | NM_001080517 | c.G2702A  | p.C901Y   |
| 187 | P096T | CAMK1    | NM_003656    | c.C1073T  | p.P358L   |

Supplemental Tables for:

Oncogenic ALK Fusion and RRAS Mutation in KRAS mutation-negative Pancreatic Ductal Adenocarcinoma

Takashi Kohno et al.

|     |       |                  |              |          |          |
|-----|-------|------------------|--------------|----------|----------|
| 188 | P096T | C3orf24;FANCD2OS | NM_001164839 | c.C68T   | p.T23M   |
| 189 | P096T | FGD5             | NM_152536    | c.G1168A | p.V390M  |
| 190 | P096T | SATB1            | NM_001131010 | c.G872A  | p.G291D  |
| 191 | P096T | EOMES            | NM_005442    | c.C470T  | p.A157V  |
| 192 | P096T | SNRK             | NM_001100594 | c.G230A  | p.R77H   |
| 193 | P096T | TMIE             | NM_147196    | c.A173G  | p.H58R   |
| 194 | P096T | NBEAL2           | NM_015175    | c.G1799T | p.G600V  |
| 195 | P096T | DALRD3           | NM_001009996 | c.G985A  | p.A329T  |
| 196 | P096T | USP19            | NM_006677    | c.G1118A | p.R373H  |
| 197 | P096T | LAMB2            | NM_002292    | c.G752A  | p.R251H  |
| 198 | P096T | C3orf62          | NM_198562    | c.C296T  | p.P99L   |
| 199 | P096T | CDHR4            | NM_001007540 | c.G368A  | p.S123N  |
| 200 | P096T | CAMKV            | NM_024046    | c.G805A  | p.V269M  |
| 201 | P096T | ZMYND10          | NM_015896    | c.A663T  | p.E221D  |
| 202 | P096T | MAPKAPK3         | NM_001243925 | c.G936T  | p.Q312H  |
| 203 | P096T | DOCK3            | NM_004947    | c.T3642G | p.N1214K |
| 204 | P096T | RBM15B           | NM_013286    | c.G1294A | p.A432T  |
| 205 | P096T | PCBP4            | NM_020418    | c.G541A  | p.V181I  |
| 206 | P096T | SEMA3G           | NM_020163    | c.C520A  | p.P174T  |
| 207 | P096T | CHDH             | NM_018397    | c.C179T  | p.T60M   |
| 208 | P096T | DNAH12           | NM_178504    | c.C5572T | p.Q1858X |
| 209 | P096T | FLNB             | NM_001164317 | c.G1111A | p.A371T  |
| 210 | P096T | TMF1             | NM_007114    | c.A871G  | p.T291A  |
| 211 | P096T | GXYLT2           | NM_001080393 | c.G749A  | p.G250D  |
| 212 | P096T | CNTN3            | NM_020872    | c.G991A  | p.V331M  |
| 213 | P096T | HHLA2            | NM_007072    | c.G178A  | p.V60I   |
| 214 | P096T | MORC1            | NM_014429    | c.C28T   | p.R10W   |
| 215 | P096T | TAGLN3           | NM_001008273 | c.C134T  | p.P45L   |
| 216 | P096T | CCDC80           | NM_199511    | c.G1385A | p.R462H  |
| 217 | P096T | BOC              | NM_033254    | c.C1173A | p.C391X  |
| 218 | P096T | BOC              | NM_033254    | c.C1664T | p.A555V  |
| 219 | P096T | BOC              | NM_033254    | c.C1769T | p.A590V  |
| 220 | P096T | ZBTB20           | NM_001164342 | c.G833A  | p.R278H  |
| 221 | P096T | GOLGB1           | NM_001256488 | c.A3962G | p.E1321G |
| 222 | P096T | MYLK             | NM_053026    | c.G4493A | p.R1498Q |
| 223 | P096T | KIAA1257         | NM_020741    | c.C494T  | p.S165L  |
| 224 | P096T | TF               | NM_001063    | c.G1345A | p.A449T  |
| 225 | P096T | MSL2             | NM_001145417 | c.G1321A | p.V441M  |
| 226 | P096T | NMNAT3           | NM_178177    | c.C124T  | p.R42W   |



Supplemental Tables for:  
Oncogenic ALK Fusion and RRAS Mutation in KRAS mutation-negative Pancreatic Ductal Adenocarcinoma  
Takashi Kohno et al.

|     |       |          |              |          |          |
|-----|-------|----------|--------------|----------|----------|
| 227 | P096T | TRIM42   | NM_152616    | c.A1105G | p.K369E  |
| 228 | P096T | TNIK     | NM_001161560 | c.G643A  | p.D215N  |
| 229 | P096T | FNDC3B   | NM_001135095 | c.C2218T | p.R740C  |
| 230 | P096T | ABCC5    | NM_001023587 | c.C575T  | p.A192V  |
| 231 | P096T | DVL3     | NM_004423    | c.C1253A | p.A418D  |
| 232 | P096T | AHSG     | NM_001622    | c.G1019A | p.R340H  |
| 233 | P096T | MFI2     | NM_005929    | c.G1468A | p.V490M  |
| 234 | P096T | LMLN     | NM_033029    | c.G1423A | p.V475M  |
| 235 | P096T | PDE6B    | NM_001145292 | c.G1495A | p.V499M  |
| 236 | P096T | LETM1    | NM_012318    | c.G1184T | p.R395M  |
| 237 | P096T | NOP14    | NM_003703    | c.C2050T | p.R684X  |
| 238 | P096T | OTOP1    | NM_177998    | c.T986C  | p.V329A  |
| 239 | P096T | WFS1     | NM_001145853 | c.C2051T | p.A684V  |
| 240 | P096T | DTHD1    | NM_001170700 | c.G940A  | p.A314T  |
| 241 | P096T | C4orf19  | NM_018302    | c.G833A  | p.G278D  |
| 242 | P096T | KLB      | NM_175737    | c.G2350A | p.A784T  |
| 243 | P096T | UGDH     | NM_001184700 | c.C52T   | p.P18S   |
| 244 | P096T | ATP8A1   | NM_001105529 | c.C2608T | p.Q870X  |
| 245 | P096T | CORIN    | NM_006587    | c.T2092G | p.S698A  |
| 246 | P096T | GSX2     | NM_133267    | c.C691T  | p.R231W  |
| 247 | P096T | CEP135   | NM_025009    | c.C3343T | p.R1115C |
| 248 | P096T | UGT2B17  | NM_001077    | c.G460A  | p.V154I  |
| 249 | P096T | AFP      | NM_001134    | c.A1456G | p.I486V  |
| 250 | P096T | SHROOM3  | NM_020859    | c.G1642A | p.A548T  |
| 251 | P096T | FRAS1    | NM_001166133 | c.C1489T | p.P497S  |
| 252 | P096T | ARHGAP24 | NM_031305    | c.C1825T | p.R609X  |
| 253 | P096T | HERC6    | NM_001165136 | c.G473T  | p.G158V  |
| 254 | P096T | CISD2    | NM_001008388 | c.C317T  | p.T106M  |
| 255 | P096T | PAPSS1   | NM_005443    | c.C151T  | p.R51C   |
| 256 | P096T | EGF      | NM_001178130 | c.G3147A | p.M1049I |
| 257 | P096T | FAT4     | NM_024582    | c.C3776A | p.A1259D |
| 258 | P096T | POU4F2   | NM_004575    | c.G844A  | p.A282T  |
| 259 | P096T | MAB21L2  | NM_006439    | c.G72T   | p.K24N   |
| 260 | P096T | FBXW7    | NM_001013415 | c.C1711T | p.R571W  |
| 261 | P096T | DCHS2    | NM_001142552 | c.T178G  | p.S60A   |
| 262 | P096T | FNIP2    | NM_020840    | c.C1576T | p.R526C  |
| 263 | P096T | GPM6A    | NM_001261447 | c.G541A  | p.V181M  |
| 264 | P096T | WWC2     | NM_024949    | c.G3281A | p.R1094Q |
| 265 | P096T | EXOC3    | NM_007277    | c.C1022T | p.T341M  |

Supplemental Tables for:  
Oncogenic ALK Fusion and RRAS Mutation in KRAS mutation-negative Pancreatic Ductal Adenocarcinoma  
Takashi Kohno et al.

|     |       |               |              |          |          |
|-----|-------|---------------|--------------|----------|----------|
| 266 | P096T | SLC6A19       | NM_001003841 | c.G1282T | p.G428W  |
| 267 | P096T | SLC6A3        | NM_001044    | c.G940A  | p.A314T  |
| 268 | P096T | TRIO          | NM_007118    | c.C4282T | p.R1428X |
| 269 | P096T | FBXL7         | NM_012304    | c.C592T  | p.R198W  |
| 270 | P096T | MYO10         | NM_012334    | c.A3755G | p.D1252G |
| 271 | P096T | RXFP3         | NM_016568    | c.T419C  | p.V140A  |
| 272 | P096T | C5orf28       | NM_022483    | c.C472T  | p.R158X  |
| 273 | P096T | PIK3R1        | NM_001242466 | c.A640G  | p.R214G  |
| 274 | P096T | TTC37         | NM_014639    | c.C4535T | p.P1512L |
| 275 | P096T | PIIP5K2       | NM_015216    | c.C3485T | p.T1162M |
| 276 | P096T | MCC           | NM_001085377 | c.G46A   | p.G16S   |
| 277 | P096T | SOWAHA        | NM_175873    | c.C664T  | p.R222C  |
| 278 | P096T | AFF4          | NM_014423    | c.G1520A | p.R507Q  |
| 279 | P096T | HSPA4         | NM_002154    | c.C460T  | p.R154X  |
| 280 | P096T | SLC25A48      | NM_145282    | c.G389A  | p.R130Q  |
| 281 | P096T | PCDHA1        | NM_018900    | c.G336T  | p.R112S  |
| 282 | P096T | PCDHA6        | NM_018909    | c.C1556T | p.A519V  |
| 283 | P096T | PCDHA9        | NM_014005    | c.C2252T | p.S751L  |
| 284 | P096T | PCDHB5        | NM_015669    | c.C391T  | p.P131S  |
| 285 | P096T | PCDHB6        | NM_018939    | c.C389T  | p.P130L  |
| 286 | P096T | PCDHGA2       | NM_018915    | c.G1744A | p.A582T  |
| 287 | P096T | PCDH12        | NM_016580    | c.G1588A | p.G530S  |
| 288 | P096T | CSF1R         | NM_005211    | c.C2257T | p.R753W  |
| 289 | P096T | SYNPO         | NM_001109974 | c.T1796C | p.V599A  |
| 290 | P096T | LARP1         | NM_015315    | c.G2450A | p.R817H  |
| 291 | P096T | ADAM19        | NM_033274    | c.G19A   | p.A7T    |
| 292 | P096T | ODZ2;TENM2    | NM_001122679 | c.C4327T | p.R1443C |
| 293 | P096T | FOXI1         | NM_012188    | c.C1013T | p.A338V  |
| 294 | P096T | FGF18         | NM_003862    | c.C496T  | p.R166W  |
| 295 | P096T | SH3PXD2B      | NM_001017995 | c.G2456A | p.R819Q  |
| 296 | P096T | CPEB4         | NM_030627    | c.C2020T | p.R674C  |
| 297 | P096T | C5orf25;SIMC1 | NM_198567    | c.G1238A | p.R413H  |
| 298 | P096T | CDHR2         | NM_001171976 | c.G1148A | p.R383H  |
| 299 | P096T | GRK6          | NM_001004105 | c.C1318T | p.R440C  |
| 300 | P096T | NHP2          | NM_017838    | c.C335T  | p.T112M  |
| 301 | P096T | COL23A1       | NM_173465    | c.G1159A | p.G387S  |
| 302 | P096T | HNRNPH1       | NM_001257293 | c.G1165A | p.G389S  |
| 303 | P096T | MAML1         | NM_014757    | c.C2534T | p.P845L  |
| 304 | P096T | SLC22A23      | NM_015482    | c.G1969A | p.E657K  |

Supplemental Tables for:  
Oncogenic ALK Fusion and RRAS Mutation in KRAS mutation-negative Pancreatic Ductal Adenocarcinoma  
Takashi Kohno et al.

|     |       |               |              |          |          |
|-----|-------|---------------|--------------|----------|----------|
| 305 | P096T | TFAP2A        | NM_001032280 | c.G1030A | p.D344N  |
| 306 | P096T | ALDH5A1       | NM_001080    | c.G430A  | p.A144T  |
| 307 | P096T | MUC22         | NM_001198815 | c.C965T  | p.T322M  |
| 308 | P096T | LTB           | NM_002341    | c.T290C  | p.L97P   |
| 309 | P096T | SAPCD1        | NM_001039651 | c.C223T  | p.R75X   |
| 310 | P096T | TNXB          | NM_019105    | c.C226T  | p.R76C   |
| 311 | P096T | HLA-DQB2      | NM_001198858 | c.A124G  | p.M42V   |
| 312 | P096T | RGL2          | NM_004761    | c.G215A  | p.R72H   |
| 313 | P096T | ITPR3         | NM_002224    | c.C6565T | p.R2189C |
| 314 | P096T | GRM4          | NM_000841    | c.G446A  | p.R149H  |
| 315 | P096T | DNAH8         | NM_001206927 | c.G7060A | p.V2354I |
| 316 | P096T | SAYSD1        | NM_018322    | c.C487A  | p.Q163K  |
| 317 | P096T | USP49         | NM_018561    | c.G566A  | p.R189Q  |
| 318 | P096T | BYSL          | NM_004053    | c.G1064A | p.R355Q  |
| 319 | P096T | KLHDC3        | NM_057161    | c.G164A  | p.R55H   |
| 320 | P096T | PTK7          | NM_001270398 | c.G314A  | p.G105D  |
| 321 | P096T | TJAP1         | NM_001146020 | c.C1594T | p.R532C  |
| 322 | P096T | POLH          | NM_006502    | c.G2029A | p.V677I  |
| 323 | P096T | ELOVL4        | NM_022726    | c.C121T  | p.P41S   |
| 324 | P096T | SNAP91        | NM_001256718 | c.G1267A | p.A423T  |
| 325 | P096T | TBX18         | NM_001080508 | c.G241A  | p.A81T   |
| 326 | P096T | ZNF292        | NM_015021    | c.C6946T | p.R2316W |
| 327 | P096T | GABRR1        | NM_001256703 | c.C781T  | p.R261C  |
| 328 | P096T | BACH2         | NM_001170794 | c.C91T   | p.R31W   |
| 329 | P096T | KLHL32        | NM_052904    | c.T524C  | p.L175P  |
| 330 | P096T | PRDM13        | NM_021620    | c.G68A   | p.R23H   |
| 331 | P096T | ASCC3         | NM_006828    | c.G2774A | p.R925Q  |
| 332 | P096T | GPR6          | NM_005284    | c.G610A  | p.V204M  |
| 333 | P096T | MCM9          | NM_017696    | c.G985A  | p.A329T  |
| 334 | P096T | TRMT11        | NM_001031712 | c.G537C  | p.Q179H  |
| 335 | P096T | KIAA0408      | NM_014702    | c.C1895T | p.P632L  |
| 336 | P096T | AHI1          | NM_001134830 | c.G1484A | p.R495H  |
| 337 | P096T | KIAA1244      | NM_020340    | c.C6167A | p.P2056H |
| 338 | P096T | GPR126        | NM_001032394 | c.C2440T | p.H814Y  |
| 339 | P096T | UTRN          | NM_007124    | c.G4891A | p.A1631T |
| 340 | P096T | ADGB;C6orf103 | NM_024694    | c.C4633T | p.R1545W |
| 341 | P096T | FNDC1         | NM_032532    | c.C2420T | p.T807M  |
| 342 | P096T | SMOC2         | NM_001166412 | c.G271A  | p.V91M   |
| 343 | P096T | DLL1          | NM_005618    | c.G541A  | p.E181K  |

Supplemental Tables for:

Oncogenic ALK Fusion and RRAS Mutation in KRAS mutation-negative Pancreatic Ductal Adenocarcinoma

Takashi Kohno et al.

|     |       |                     |              |          |          |
|-----|-------|---------------------|--------------|----------|----------|
| 344 | P096T | INTS1               | NM_001080453 | c.G3287A | p.R1096H |
| 345 | P096T | INTS1               | NM_001080453 | c.G904A  | p.A302T  |
| 346 | P096T | SDK1                | NM_001079653 | c.G1333A | p.A445T  |
| 347 | P096T | RADIL               | NM_018059    | c.C3160T | p.R1054W |
| 348 | P096T | PAPOLB              | NM_020144    | c.G43C   | p.A15P   |
| 349 | P096T | FBXL18              | NM_024963    | c.C616T  | p.R206C  |
| 350 | P096T | ZDHHC4              | NM_001134387 | c.T268G  | p.Y90D   |
| 351 | P096T | ABCB5               | NM_178559    | c.G2140A | p.G714S  |
| 352 | P096T | DNAH11              | NM_001277115 | c.G6010A | p.E2004K |
| 353 | P096T | HOXA9;RP1-170O19.20 | NM_152739    | c.C521T  | p.A174V  |
| 354 | P096T | CPVL                | NM_019029    | c.C335T  | p.P112L  |
| 355 | P096T | TBX20               | NM_001077653 | c.C797T  | p.A266V  |
| 356 | P096T | INHBA               | NM_002192    | c.G793A  | p.E265K  |
| 357 | P096T | MRPL32              | NM_031903    | c.G387T  | p.K129N  |
| 358 | P096T | STK17A              | NM_004760    | c.C266T  | p.A89V   |
| 359 | P096T | URGCP               | NM_017920    | c.G773A  | p.R258H  |
| 360 | P096T | IGFBP3              | NM_000598    | c.C35T   | p.A12V   |
| 361 | P096T | TNS3                | NM_022748    | c.C2581T | p.R861C  |
| 362 | P096T | ZNF479              | NM_033273    | c.G1064A | p.C355Y  |
| 363 | P096T | NSUN5               | NM_001168347 | c.C1057T | p.R353W  |
| 364 | P096T | WBSCR22             | NM_017528    | c.C724T  | p.R242W  |
| 365 | P096T | WBSCR27             | NM_152559    | c.A527G  | p.Y176C  |
| 366 | P096T | CLIP2               | NM_003388    | c.G1042A | p.A348T  |
| 367 | P096T | GSAP;PION           | NM_017439    | c.G1297A | p.A433T  |
| 368 | P096T | CACNA2D1            | NM_000722    | c.C3091T | p.P1031S |
| 369 | P096T | KIAA1324L           | NM_152748    | c.C2396T | p.T799M  |
| 370 | P096T | DMTF1               | NM_001142326 | c.G444T  | p.K148N  |
| 371 | P096T | C7orf63             | NM_001039706 | c.G917A  | p.R306H  |
| 372 | P096T | SAMD9L              | NM_152703    | c.G1766A | p.R589Q  |
| 373 | P096T | CALCR               | NM_001164738 | c.G847A  | p.V283M  |
| 374 | P096T | DYNC1I1             | NM_001135556 | c.A350G  | p.Q117R  |
| 375 | P096T | DLX6                | NM_005222    | c.G310T  | p.G104X  |
| 376 | P096T | NYAP1               | NM_173564    | c.G470A  | p.R157Q  |
| 377 | P096T | NYAP1               | NM_173564    | c.G902A  | p.R301H  |
| 378 | P096T | MOSPD3              | NM_001040099 | c.G488A  | p.R163H  |
| 379 | P096T | WNT16               | NM_016087    | c.G280A  | p.G94S   |
| 380 | P096T | ASB15               | NM_080928    | c.T1331C | p.M444T  |
| 381 | P096T | FAM40B;STRIP2       | NM_020704    | c.G2333A | p.R778H  |
| 382 | P096T | WDR91               | NM_014149    | c.G1789A | p.A597T  |

Supplemental Tables for:

Oncogenic ALK Fusion and RRAS Mutation in KRAS mutation-negative Pancreatic Ductal Adenocarcinoma

Takashi Kohno et al.

|     |       |               |              |           |          |
|-----|-------|---------------|--------------|-----------|----------|
| 383 | P096T | PRSS1         | NM_002769    | c.G284A   | p.R95H   |
| 384 | P096T | TRPV6         | NM_018646    | c.C1261A  | p.L421I  |
| 385 | P096T | TMEM139       | NM_001242777 | c.C76T    | p.R26W   |
| 386 | P096T | OR2A25        | NM_001004488 | c.C361T   | p.R121W  |
| 387 | P096T | TPK1          | NM_001042482 | c.G98A    | p.R33H   |
| 388 | P096T | ZNF282        | NM_003575    | c.C1931T  | p.S644L  |
| 389 | P096T | ZNF783        | NM_001195220 | c.G511A   | p.V171M  |
| 390 | P096T | ZNF777        | NM_015694    | c.G1558A  | p.V520M  |
| 391 | P096T | SSPO          | NM_198455    | c.C11110T | p.R3704C |
| 392 | P096T | REPIN1        | NM_014374    | c.C959T   | p.S320L  |
| 393 | P096T | ABP1          | NM_001091    | c.G1550A  | p.R517H  |
| 394 | P096T | AGAP3         | NM_031946    | c.T2321C  | p.F774S  |
| 395 | P096T | NCAPG2        | NM_017760    | c.G349A   | p.E117K  |
| 396 | P096T | KBTBD11       | NM_014867    | c.C1291T  | p.R431C  |
| 397 | P096T | CSMD1         | NM_033225    | c.G5278A  | p.G1760S |
| 398 | P096T | MTMR7         | NM_004686    | c.G1400A  | p.R467Q  |
| 399 | P096T | DOK2          | NM_003974    | c.G137A   | p.G46D   |
| 400 | P096T | LGI3          | NM_139278    | c.C1378T  | p.Q460X  |
| 401 | P096T | EGR3          | NM_001199880 | c.A559G   | p.I187V  |
| 402 | P096T | TNFRSF10B     | NM_003842    | c.C790T   | p.R264X  |
| 403 | P096T | ADRA1A        | NM_000680    | c.A19G    | p.N7D    |
| 404 | P096T | STMN4         | NM_030795    | c.G217A   | p.V73I   |
| 405 | P096T | SCARA3        | NM_016240    | c.G895A   | p.D299N  |
| 406 | P096T | C8orf80;NUGGC | NM_001010906 | c.G958A   | p.D320N  |
| 407 | P096T | SFRP1         | NM_003012    | c.C539A   | p.P180H  |
| 408 | P096T | ANK1          | NM_001142445 | c.C310T   | p.R104C  |
| 409 | P096T | KIAA0146      | NM_001080394 | c.G2362A  | p.E788K  |
| 410 | P096T | CHD7          | NM_017780    | c.G584A   | p.R195H  |
| 411 | P096T | CRISPLD1      | NM_031461    | c.G782A   | p.R261Q  |
| 412 | P096T | ZFHX4         | NM_024721    | c.C6553T  | p.R2185X |
| 413 | P096T | DECR1         | NM_001359    | c.G901A   | p.G301S  |
| 414 | P096T | RUNX1T1       | NM_175636    | c.G1390A  | p.A464T  |
| 415 | P096T | TMEM74        | NM_153015    | c.G475A   | p.E159K  |
| 416 | P096T | TRPS1         | NM_014112    | c.C2893T  | p.R965C  |
| 417 | P096T | DEPTOR        | NM_022783    | c.G674A   | p.R225Q  |
| 418 | P096T | ADCY8         | NM_001115    | c.A3647G  | p.N1216S |
| 419 | P096T | COL22A1       | NM_152888    | c.G2944A  | p.G982R  |
| 420 | P096T | LY6K          | NM_001160354 | c.G157A   | p.E53K   |
| 421 | P096T | NAPRT1        | NM_145201    | c.G205A   | p.A69T   |

Supplemental Tables for:

Oncogenic ALK Fusion and RRAS Mutation in KRAS mutation-negative Pancreatic Ductal Adenocarcinoma

Takashi Kohno et al.

|     |       |           |              |          |          |
|-----|-------|-----------|--------------|----------|----------|
| 422 | P096T | FAM83H    | NM_198488    | c.C1348T | p.R450C  |
| 423 | P096T | SCRIB     | NM_015356    | c.G2407A | p.A803T  |
| 424 | P096T | PLEC      | NM_201378    | c.C5612T | p.A1871V |
| 425 | P096T | PLEC      | NM_201380    | c.G127A  | p.V43I   |
| 426 | P096T | OPLAH     | NM_017570    | c.C679T  | p.R227C  |
| 427 | P096T | ZNF250    | NM_001109689 | c.G785A  | p.S262N  |
| 428 | P096T | CDKN2A    | NM_000077    | c.C238T  | p.R80X   |
| 429 | P096T | TOPORS    | NM_001195622 | c.G1613A | p.R538H  |
| 430 | P096T | FAM205A   | NM_001141917 | c.G3256T | p.G1086W |
| 431 | P096T | TLN1      | NM_006289    | c.C6941T | p.A2314V |
| 432 | P096T | NPR2      | NM_003995    | c.G494A  | p.R165H  |
| 433 | P096T | NPR2      | NM_003995    | c.T605C  | p.V202A  |
| 434 | P096T | MELK      | NM_001256689 | c.G62A   | p.R21Q   |
| 435 | P096T | ALDH1B1   | NM_000692    | c.G284A  | p.R95Q   |
| 436 | P096T | APBA1     | NM_001163    | c.G373A  | p.E125K  |
| 437 | P096T | PCSK5     | NM_006200    | c.C2645T | p.A882V  |
| 438 | P096T | PCSK5     | NM_001190482 | c.T5116C | p.C1706R |
| 439 | P096T | DAPK1     | NM_004938    | c.G106A  | p.G36S   |
| 440 | P096T | SECISBP2  | NM_024077    | c.G1756A | p.E586K  |
| 441 | P096T | FAM120A   | NM_014612    | c.G1935A | p.W645X  |
| 442 | P096T | PTCH1     | NM_000264    | c.G4081A | p.V1361M |
| 443 | P096T | TRIM14    | NM_014788    | c.G583A  | p.G195R  |
| 444 | P096T | GRIN3A    | NM_133445    | c.G3026A | p.R1009H |
| 445 | P096T | NIPSNAP3A | NM_015469    | c.G617A  | p.R206H  |
| 446 | P096T | CTNNA1    | NM_003798    | c.G1074T | p.Q358H  |
| 447 | P096T | SVEP1     | NM_153366    | c.G4794T | p.E1598D |
| 448 | P096T | LPAR1     | NM_001401    | c.C988T  | p.R330C  |
| 449 | P096T | LPAR1     | NM_001401    | c.C232T  | p.R78C   |
| 450 | P096T | COL27A1   | NM_032888    | c.G4618A | p.A1540T |
| 451 | P096T | TNC       | NM_002160    | c.G4910A | p.R1637H |
| 452 | P096T | C5        | NM_001735    | c.C3736T | p.R1246C |
| 453 | P096T | PSMB7     | NM_002799    | c.G344A  | p.R115H  |
| 454 | P096T | GPR144    | NM_001161808 | c.A1244G | p.H415R  |
| 455 | P096T | ZDHHC12   | NM_032799    | c.C361T  | p.R121C  |
| 456 | P096T | USP20     | NM_001008563 | c.G2707A | p.G903R  |
| 457 | P096T | FNBP1     | NM_015033    | c.A623G  | p.H208R  |
| 458 | P096T | ABL1      | NM_005157    | c.C2134T | p.R712C  |
| 459 | P096T | AK8       | NM_152572    | c.G679A  | p.V227I  |
| 460 | P096T | TSC1      | NM_001162427 | c.C1999T | p.R667W  |

Supplemental Tables for:  
Oncogenic ALK Fusion and RRAS Mutation in KRAS mutation-negative Pancreatic Ductal Adenocarcinoma  
Takashi Kohno et al.

|     |       |                |              |          |          |
|-----|-------|----------------|--------------|----------|----------|
| 461 | P096T | ADAMTS13       | NM_139025    | c.G3494A | p.R1165Q |
| 462 | P096T | COL5A1         | NM_000093    | c.G1351A | p.E451K  |
| 463 | P096T | COL5A1         | NM_000093    | c.G2936A | p.G979E  |
| 464 | P096T | OLFM1          | NM_014279    | c.C404T  | p.A135V  |
| 465 | P096T | PPP1R26        | NM_014811    | c.C1408T | p.R470W  |
| 466 | P096T | INPP5E         | NM_019892    | c.C1064T | p.T355M  |
| 467 | P096T | INPP5E         | NM_019892    | c.C860T  | p.A287V  |
| 468 | P096T | C9orf167;TOR4A | NM_017723    | c.G247A  | p.A83T   |
| 469 | P096T | PNPLA7         | NM_152286    | c.C3359T | p.A1120V |
| 470 | P096T | CACNA1B        | NM_000718    | c.C2563T | p.R855C  |
| 471 | P096T | ADARB2         | NM_018702    | c.G242A  | p.R81Q   |
| 472 | P096T | PITRM1         | NM_001242309 | c.C485T  | p.T162M  |
| 473 | P096T | USP6NL         | NM_001080491 | c.G1738A | p.A580T  |
| 474 | P096T | PTER           | NM_001261838 | c.C427T  | p.R143X  |
| 475 | P096T | GPR158         | NM_020752    | c.A1856G | p.N619S  |
| 476 | P096T | LYZL2          | NM_183058    | c.C149T  | p.A50V   |
| 477 | P096T | ZNF22          | NM_006963    | c.A363C  | p.K121N  |
| 478 | P096T | ZFAND4         | NM_001128324 | c.G545A  | p.R182Q  |
| 479 | P096T | RBP3           | NM_002900    | c.A385G  | p.N129D  |
| 480 | P096T | GDF2           | NM_016204    | c.G1283A | p.C428Y  |
| 481 | P096T | MAPK8          | NM_002750    | c.G449A  | p.R150Q  |
| 482 | P096T | OGDHL          | NM_001143997 | c.G2246A | p.R749H  |
| 483 | P096T | OGDHL          | NM_001143997 | c.G1292A | p.W431X  |
| 484 | P096T | A1CF           | NM_014576    | c.G62A   | p.R21H   |
| 485 | P096T | BICC1          | NM_001080512 | c.A253G  | p.N85D   |
| 486 | P096T | SLC16A9        | NM_194298    | c.C971T  | p.S324L  |
| 487 | P096T | ARID5B         | NM_001244638 | c.C2762A | p.P921H  |
| 488 | P096T | JMJD1C         | NM_004241    | c.G5103A | p.M1701I |
| 489 | P096T | LRRTM3         | NM_178011    | c.G1273A | p.V425M  |
| 490 | P096T | DNAJC12        | NM_021800    | c.A125G  | p.H42R   |
| 491 | P096T | MYPN           | NM_032578    | c.G2765A | p.R922H  |
| 492 | P096T | SLC29A3        | NM_001174098 | c.C73T   | p.R25X   |
| 493 | P096T | CDH23          | NM_022124    | c.C4316T | p.A1439V |
| 494 | P096T | CAMK2G         | NM_001204492 | c.G454A  | p.A152T  |
| 495 | P096T | POLR3A         | NM_007055    | c.C2135T | p.A712V  |
| 496 | P096T | POLR3A         | NM_007055    | c.G86A   | p.R29H   |
| 497 | P096T | MMRN2          | NM_024756    | c.G931A  | p.V311M  |
| 498 | P096T | ALDH18A1       | NM_001017423 | c.A2374G | p.T792A  |
| 499 | P096T | SLIT1          | NM_003061    | c.G3055A | p.V1019I |

Supplemental Tables for:

Oncogenic ALK Fusion and RRAS Mutation in KRAS mutation-negative Pancreatic Ductal Adenocarcinoma

Takashi Kohno et al.

|     |       |          |              |          |          |
|-----|-------|----------|--------------|----------|----------|
| 500 | P096T | MMS19    | NM_022362    | c.G917A  | p.R306H  |
| 501 | P096T | HPS1     | NM_000195    | c.G598A  | p.E200K  |
| 502 | P096T | ABCC2    | NM_000392    | c.G565A  | p.E189K  |
| 503 | P096T | CPN1     | NM_001308    | c.C734T  | p.T245M  |
| 504 | P096T | LZTS2    | NM_032429    | c.C1777T | p.R593W  |
| 505 | P096T | TLX1     | NM_001195517 | c.G430A  | p.V144M  |
| 506 | P096T | NOLC1    | NM_004741    | c.A724G  | p.T242A  |
| 507 | P096T | PCGF6    | NM_001011663 | c.C137T  | p.A46V   |
| 508 | P096T | TAF5     | NM_006951    | c.A1565G | p.D522G  |
| 509 | P096T | PDCD4    | NM_001199492 | c.G115C  | p.A39P   |
| 510 | P096T | DPYSL4   | NM_006426    | c.C986T  | p.T329I  |
| 511 | P096T | PWWP2B   | NM_001098637 | c.C1342T | p.P448S  |
| 512 | P096T | MTG1     | NM_138384    | c.G616A  | p.V206M  |
| 513 | P096T | ANO9     | NM_001012302 | c.G1343A | p.G448D  |
| 514 | P096T | DRD4     | NM_000797    | c.C1105T | p.Q369X  |
| 515 | P096T | TSPAN4   | NM_001025238 | c.C490T  | p.R164W  |
| 516 | P096T | AP2A2    | NM_001242837 | c.G2313T | p.Q771H  |
| 517 | P096T | OSBPL5   | NM_001144063 | c.C757T  | p.R253W  |
| 518 | P096T | OR52W1   | NM_001005178 | c.G398A  | p.R133H  |
| 519 | P096T | ARFIP2   | NM_001242856 | c.C455T  | p.A152V  |
| 520 | P096T | DCHS1    | NM_003737    | c.C6503T | p.A2168V |
| 521 | P096T | NLRP10   | NM_176821    | c.G1475A | p.R492H  |
| 522 | P096T | MRVI1    | NM_001098579 | c.C647T  | p.P216L  |
| 523 | P096T | ARNTL    | NM_001030272 | c.G988A  | p.G330R  |
| 524 | P096T | INSC     | NM_001031853 | c.C379T  | p.R127W  |
| 525 | P096T | KCNC1    | NM_001112741 | c.C1268T | p.A423V  |
| 526 | P096T | DEPDC7   | NM_001077242 | c.G1318A | p.G440R  |
| 527 | P096T | ALKBH3   | NM_139178    | c.C65T   | p.A22V   |
| 528 | P096T | MAPK8IP1 | NM_005456    | c.C1594T | p.R532C  |
| 529 | P096T | HARBI1   | NM_173811    | c.C649T  | p.H217Y  |
| 530 | P096T | ARFGAP2  | NM_001242832 | c.C1231T | p.R411W  |
| 531 | P096T | PSMC3    | NM_002804    | c.G911A  | p.R304Q  |
| 532 | P096T | OR4C6    | NM_001004704 | c.G460A  | p.A154T  |
| 533 | P096T | MS4A15   | NM_001098835 | c.C227T  | p.T76M   |
| 534 | P096T | LRRC10B  | NM_001145077 | c.C439T  | p.R147W  |
| 535 | P096T | DAGLA    | NM_006133    | c.G245A  | p.R82H   |
| 536 | P096T | BSCL2    | NM_001122955 | c.C773T  | p.P258L  |
| 537 | P096T | MARK2    | NM_001039469 | c.G905A  | p.R302Q  |
| 538 | P096T | FERMT3   | NM_031471    | c.G1434A | p.T478T  |



Supplemental Tables for:  
Oncogenic ALK Fusion and RRAS Mutation in KRAS mutation-negative Pancreatic Ductal Adenocarcinoma  
Takashi Kohno et al.

|     |       |              |              |           |          |
|-----|-------|--------------|--------------|-----------|----------|
| 539 | P096T | TRPT1        | NM_001160393 | c.G140A   | p.G47E   |
| 540 | P096T | CCDC88B      | NM_032251    | c.C2336T  | p.A779V  |
| 541 | P096T | SLC22A11     | NM_018484    | c.C668T   | p.T223M  |
| 542 | P096T | NRXN2        | NM_138734    | c.C637T   | p.R213C  |
| 543 | P096T | CDC42BPG     | NM_017525    | c.G2804A  | p.R935H  |
| 544 | P096T | ATG2A        | NM_015104    | c.C719T   | p.P240L  |
| 545 | P096T | CAPN1        | NM_001198868 | c.G1522A  | p.D508N  |
| 546 | P096T | FRMD8        | NM_031904    | c.G745A   | p.A249T  |
| 547 | P096T | EHBP1L1      | NM_001099409 | c.G149A   | p.R50H   |
| 548 | P096T | CTSW         | NM_001335    | c.C817T   | p.R273W  |
| 549 | P096T | SART1        | NM_005146    | c.G208A   | p.A70T   |
| 550 | P096T | CCDC87       | NM_018219    | c.C2207T  | p.A736V  |
| 551 | P096T | PC           | NM_022172    | c.C1930T  | p.R644W  |
| 552 | P096T | KDM2A        | NM_012308    | c.G1040A  | p.R347H  |
| 553 | P096T | SSH3         | NM_017857    | c.C1255T  | p.R419C  |
| 554 | P096T | LRP5         | NM_002335    | c.C3196T  | p.R1066C |
| 555 | P096T | DHCR7        | NM_001163817 | c.C748T   | p.L250F  |
| 556 | P096T | LRTOMT       | NM_001145308 | c.C585T   | p.D195D  |
| 557 | P096T | STARD10      | NM_006645    | c.G383A   | p.R128H  |
| 558 | P096T | SLCO2B1      | NM_001145212 | c.C1471T  | p.R491C  |
| 559 | P096T | MYO7A        | NM_000260    | c.G1210A  | p.G404R  |
| 560 | P096T | GDPD4        | NM_182833    | c.G916A   | p.A306T  |
| 561 | P096T | USP35        | NM_020798    | c.G1666A  | p.E556K  |
| 562 | P096T | DLG2         | NM_001142700 | c.C301T   | p.R101W  |
| 563 | P096T | FAT3         | NM_001008781 | c.G12412A | p.V4138M |
| 564 | P096T | KDM4DL;KDM4E | NM_001161630 | c.T778C   | p.C260R  |
| 565 | P096T | DYNC2H1      | NM_001080463 | c.G6116A  | p.R2039H |
| 566 | P096T | GRIA4        | NM_000829    | c.T2681C  | p.L894S  |
| 567 | P096T | EXPH5        | NM_015065    | c.G1733A  | p.G578D  |
| 568 | P096T | RDX          | NM_001260496 | c.C571T   | p.R191C  |
| 569 | P096T | FAM55B;NXPE2 | NM_182495    | c.A1465C  | p.T489P  |
| 570 | P096T | CEP164       | NM_001271933 | c.G3772A  | p.G1258R |
| 571 | P096T | DSCAML1      | NM_020693    | c.G2739T  | p.K913N  |
| 572 | P096T | PHLDB1       | NM_001144759 | c.G3413A  | p.R1138Q |
| 573 | P096T | PHLDB1       | NM_001144759 | c.G3902A  | p.R1301H |
| 574 | P096T | CXCR5        | NM_032966    | c.C625T   | p.R209W  |
| 575 | P096T | C1QTNF5;MFRP | NM_031433    | c.C169T   | p.R57X   |
| 576 | P096T | USP2         | NM_001243759 | c.C314T   | p.P105L  |
| 577 | P096T | SRPR         | NM_001177842 | c.C1657T  | p.L553F  |

Supplemental Tables for:

Oncogenic ALK Fusion and RRAS Mutation in KRAS mutation-negative Pancreatic Ductal Adenocarcinoma

Takashi Kohno et al.

|     |       |                     |              |          |          |
|-----|-------|---------------------|--------------|----------|----------|
| 578 | P096T | FOXRED1             | NM_017547    | c.T835C  | p.Y279H  |
| 579 | P096T | TP53AIP1            | NM_001251964 | c.G290A  | p.C97Y   |
| 580 | P096T | ADAMTS8             | NM_007037    | c.C1730T | p.T577M  |
| 581 | P096T | NCAPD2              | NM_014865    | c.C3404T | p.A1135V |
| 582 | P096T | ATN1                | NM_001007026 | c.G1834A | p.A612T  |
| 583 | P096T | PEX5                | NM_000319    | c.C1345T | p.R449C  |
| 584 | P096T | GDF3                | NM_020634    | c.C893A  | p.P298H  |
| 585 | P096T | PLEKHA5             | NM_001143821 | c.A58T   | p.I20F   |
| 586 | P096T | C12orf39            | NM_030572    | c.C269T  | p.A90V   |
| 587 | P096T | C2CD5;KIAA0528      | NM_014802    | c.T2076G | p.H692Q  |
| 588 | P096T | TM7SF3              | NM_016551    | c.C515T  | p.A172V  |
| 589 | P096T | ADAMTS20            | NM_025003    | c.G445A  | p.G149R  |
| 590 | P096T | TMEM117             | NM_032256    | c.C1454T | p.S485L  |
| 591 | P096T | DBX2                | NM_001004329 | c.G1015A | p.V339I  |
| 592 | P096T | ARID2               | NM_152641    | c.G1343A | p.C448Y  |
| 593 | P096T | ADCY6               | NM_015270    | c.C64T   | p.R22C   |
| 594 | P096T | ARF3                | NM_001659    | c.C55T   | p.R19C   |
| 595 | P096T | DIP2B               | NM_173602    | c.G2045A | p.R682H  |
| 596 | P096T | CSRNP2              | NM_030809    | c.G280T  | p.G94C   |
| 597 | P096T | AAAS                | NM_001173466 | c.G890A  | p.R297H  |
| 598 | P096T | MAP3K12             | NM_001193511 | c.C1471A | p.L491I  |
| 599 | P096T | ATF7;RP11-793H13.10 | NM_001130060 | c.G938A  | p.R313Q  |
| 600 | P096T | RDH5                | NM_001199771 | c.C881T  | p.A294V  |
| 601 | P096T | TIMELESS            | NM_003920    | c.G2812A | p.A938T  |
| 602 | P096T | BAZ2A               | NM_013449    | c.C4007T | p.P1336L |
| 603 | P096T | STAT6               | NM_001178078 | c.C200T  | p.S67L   |
| 604 | P096T | LRP1                | NM_002332    | c.G3511A | p.D1171N |
| 605 | P096T | LRP1                | NM_002332    | c.G6394A | p.V2132M |
| 606 | P096T | SHMT2               | NM_001166356 | c.G677A  | p.R226H  |
| 607 | P096T | INHBE               | NM_031479    | c.T283A  | p.F95I   |
| 608 | P096T | AVIL                | NM_006576    | c.C280T  | p.R94X   |
| 609 | P096T | PTPRB               | NM_001206971 | c.C214T  | p.R72W   |
| 610 | P096T | KCNC2               | NM_001260497 | c.G424T  | p.G142C  |
| 611 | P096T | PPP1R12A            | NM_001143886 | c.C1249T | p.R417X  |
| 612 | P096T | PLXNC1              | NM_005761    | c.C2048T | p.T683M  |
| 613 | P096T | PARPBP              | NM_017915    | c.G250A  | p.V84M   |
| 614 | P096T | BTBD11              | NM_001018072 | c.G1276A | p.A426T  |
| 615 | P096T | FICD                | NM_007076    | c.C352T  | p.R118C  |
| 616 | P096T | ERP29               | NM_006817    | c.C223T  | p.R75C   |

Supplemental Tables for:  
Oncogenic ALK Fusion and RRAS Mutation in KRAS mutation-negative Pancreatic Ductal Adenocarcinoma  
Takashi Kohno et al.

|     |       |                      |              |           |          |
|-----|-------|----------------------|--------------|-----------|----------|
| 617 | P096T | NAA25                | NM_024953    | c.C2068T  | p.R690X  |
| 618 | P096T | C12orf51;HECTD4      | NM_001109662 | c.G8108A  | p.R2703Q |
| 619 | P096T | C12orf51;HECTD4      | NM_001109662 | c.C3365T  | p.P1122L |
| 620 | P096T | DTX1                 | NM_004416    | c.G1136A  | p.R379H  |
| 621 | P096T | TPCN1                | NM_017901    | c.G892A   | p.V298I  |
| 622 | P096T | NOS1                 | NM_001204213 | c.C2989T  | p.Q997X  |
| 623 | P096T | KSR2                 | NM_173598    | c.G2077A  | p.V693M  |
| 624 | P096T | KSR2                 | NM_173598    | c.G689A   | p.R230H  |
| 625 | P096T | POP5                 | NM_198202    | c.C253T   | p.R85W   |
| 626 | P096T | SETD1B               | NM_015048    | c.G3271A  | p.E1091K |
| 627 | P096T | LRRC43               | NM_001098519 | c.C1318T  | p.R440C  |
| 628 | P096T | DNAH10               | NM_207437    | c.G10258A | p.V3420I |
| 629 | P096T | NCOR2                | NM_001077261 | c.C6856T  | p.R2286W |
| 630 | P096T | DHX37                | NM_032656    | c.C1775T  | p.P592L  |
| 631 | P096T | MMP17                | NM_016155    | c.C704T   | p.S235L  |
| 632 | P096T | MMP17                | NM_016155    | c.C799T   | p.R267W  |
| 633 | P096T | NOC4L                | NM_024078    | c.G1363A  | p.V455I  |
| 634 | P096T | POLE                 | NM_006231    | c.G4582A  | p.A1528T |
| 635 | P096T | ANHX;LOC647589       | NM_001191054 | c.T152C   | p.L51P   |
| 636 | P096T | PSPC1                | NM_001042414 | c.G1562A  | p.R521H  |
| 637 | P096T | GJA3                 | NM_021954    | c.A1256G  | p.K419R  |
| 638 | P096T | RNF6                 | NM_005977    | c.C820T   | p.R274W  |
| 639 | P096T | CDK8                 | NM_001260    | c.C1066T  | p.R356X  |
| 640 | P096T | NBEA                 | NM_015678    | c.C4738T  | p.R1580C |
| 641 | P096T | MAB21L1              | NM_005584    | c.C77T    | p.A26V   |
| 642 | P096T | DCLK1                | NM_001195415 | c.G590A   | p.S197N  |
| 643 | P096T | FREM2                | NM_207361    | c.C6806T  | p.S2269L |
| 644 | P096T | MLNR                 | NM_001507    | c.C466T   | p.R156C  |
| 645 | P096T | MYCBP2               | NM_015057    | c.G13036T | p.G4346C |
| 646 | P096T | DKFZp586G0322;MYCBP2 | NM_015057    | c.G9206T  | p.R3069M |
| 647 | P096T | RNF113B              | NM_178861    | c.G655A   | p.D219N  |
| 648 | P096T | A2LD1;GGACT          | NM_033110    | c.G352A   | p.V118M  |
| 649 | P096T | GRTP1                | NM_024719    | c.C625T   | p.R209W  |
| 650 | P096T | RNASE4               | NM_002937    | c.G179A   | p.R60Q   |
| 651 | P096T | ARHGEF40             | NM_018071    | c.C4144T  | p.R1382X |
| 652 | P096T | ARHGEF40             | NM_018071    | c.G4307A  | p.G1436D |
| 653 | P096T | METTL3               | NM_019852    | c.C1243T  | p.R415C  |
| 654 | P096T | ZFHX2                | NM_033400    | c.C3472T  | p.R1158C |
| 655 | P096T | C14orf21;NOP9        | NM_174913    | c.C1237T  | p.R413C  |

Supplemental Tables for:

Oncogenic ALK Fusion and RRAS Mutation in KRAS mutation-negative Pancreatic Ductal Adenocarcinoma

Takashi Kohno et al.

|     |       |                   |              |           |          |
|-----|-------|-------------------|--------------|-----------|----------|
| 656 | P096T | FANCM             | NM_020937    | c.A926G   | p.E309G  |
| 657 | P096T | PYGL              | NM_001163940 | c.G1367T  | p.R456M  |
| 658 | P096T | TRIM9             | NM_015163    | c.C839T   | p.A280V  |
| 659 | P096T | C14orf101;TMEM260 | NM_017799    | c.T1630C  | p.C544R  |
| 660 | P096T | SYNE2             | NM_015180    | c.A15475G | p.N5159D |
| 661 | P096T | SPTB              | NM_000347    | c.C1441A  | p.L481M  |
| 662 | P096T | KIAA0247          | NM_014734    | c.C217A   | p.L73M   |
| 663 | P096T | FOS               | NM_005252    | c.G431T   | p.R144M  |
| 664 | P096T | GALC              | NM_001201401 | c.G1016A  | p.G339D  |
| 665 | P096T | TTC7B             | NM_001010854 | c.C1468T  | p.R490X  |
| 666 | P096T | TRIP11            | NM_004239    | c.T1421G  | p.L474R  |
| 667 | P096T | DDX24             | NM_020414    | c.C2377T  | p.R793C  |
| 668 | P096T | C14orf129;GSKIP   | NM_001271906 | c.C161T   | p.S54L   |
| 669 | P096T | SLC25A47          | NM_207117    | c.C65T    | p.T22M   |
| 670 | P096T | MOK               | NM_001272011 | c.C386T   | p.T129M  |
| 671 | P096T | TECPR2            | NM_001172631 | c.G1030T  | p.G344X  |
| 672 | P096T | EIF5              | NM_183004    | c.C934T   | p.R312W  |
| 673 | P096T | KIF26A            | NM_015656    | c.G371A   | p.R124H  |
| 674 | P096T | AHNAK2            | NM_138420    | c.G4566T  | p.K1522N |
| 675 | P096T | AHNAK2            | NM_138420    | c.C842T   | p.S281L  |
| 676 | P096T | JAG2              | NM_145159    | c.G1397A  | p.S466N  |
| 677 | P096T | TEX22             | NM_001195082 | c.G398A   | p.S133N  |
| 678 | P096T | OR4M2             | NM_001004719 | c.C563A   | p.A188D  |
| 679 | P096T | CYFIP1            | NM_001033028 | c.C224T   | p.P75L   |
| 680 | P096T | HERC2             | NM_004667    | c.C2984T  | p.T995M  |
| 681 | P096T | FAM189A1          | NM_015307    | c.G538A   | p.V180M  |
| 682 | P096T | TJP1              | NM_175610    | c.G3514A  | p.E1172K |
| 683 | P096T | GJD2              | NM_020660    | c.G323A   | p.R108H  |
| 684 | P096T | DISP2             | NM_033510    | c.A550G   | p.T184A  |
| 685 | P096T | FAM82A2;RMDN3     | NM_018145    | c.C1051T  | p.H351Y  |
| 686 | P096T | DLL4              | NM_019074    | c.C1675T  | p.R559W  |
| 687 | P096T | RPAP1             | NM_015540    | c.G3392A  | p.R1131Q |
| 688 | P096T | RPAP1             | NM_015540    | c.G2386A  | p.V796I  |
| 689 | P096T | PLA2G4D           | NM_178034    | c.G2158A  | p.A720T  |
| 690 | P096T | PATL2             | NM_001145112 | c.C1163T  | p.T388I  |
| 691 | P096T | SLC12A1           | NM_000338    | c.C1521T  | p.S507S  |
| 692 | P096T | LEO1              | NM_138792    | c.G1427A  | p.G476D  |
| 693 | P096T | MYO5A             | NM_000259    | c.G2126A  | p.R709H  |
| 694 | P096T | NEDD4             | NM_198400    | c.T3212C  | p.V1071A |

Supplemental Tables for:

Oncogenic ALK Fusion and RRAS Mutation in KRAS mutation-negative Pancreatic Ductal Adenocarcinoma

Takashi Kohno et al.

|     |       |                |              |          |          |
|-----|-------|----------------|--------------|----------|----------|
| 695 | P096T | LIPC           | NM_000236    | c.G758A  | p.G253D  |
| 696 | P096T | ANXA2          | NM_001002858 | c.C1043T | p.A348V  |
| 697 | P096T | VPS13C         | NM_017684    | c.C1496T | p.T499M  |
| 698 | P096T | ZNF609         | NM_015042    | c.C3436T | p.P1146S |
| 699 | P096T | PARP16         | NM_017851    | c.G667A  | p.V223I  |
| 700 | P096T | IGDCC4         | NM_020962    | c.C958T  | p.R320C  |
| 701 | P096T | SMAD3          | NM_001145104 | c.C517T  | p.R173X  |
| 702 | P096T | AAGAB          | NM_024666    | c.G4T    | p.A2S    |
| 703 | P096T | ITGA11         | NM_001004439 | c.A1973G | p.D658G  |
| 704 | P096T | NOX5           | NM_001184779 | c.C809T  | p.A270V  |
| 705 | P096T | GOLGA6B        | NM_018652    | c.G596A  | p.R199Q  |
| 706 | P096T | ISLR2          | NM_020851    | c.G458A  | p.R153H  |
| 707 | P096T | ARID3B         | NM_006465    | c.G289T  | p.G97C   |
| 708 | P096T | ARID3B         | NM_006465    | c.C1565T | p.S522F  |
| 709 | P096T | CSK            | NM_004383    | c.G760A  | p.V254M  |
| 710 | P096T | CSPG4          | NM_001897    | c.C3224T | p.T1075M |
| 711 | P096T | AX747193;PEAK1 | NM_024776    | c.C2615T | p.P872L  |
| 712 | P096T | WDR61          | NM_025234    | c.C338T  | p.A113V  |
| 713 | P096T | ARNT2          | NM_014862    | c.C1961T | p.S654L  |
| 714 | P096T | MEX3B          | NM_032246    | c.G1634A | p.R545H  |
| 715 | P096T | ALPK3          | NM_020778    | c.G4322A | p.G1441D |
| 716 | P096T | ACAN           | NM_001135    | c.C2513T | p.S838L  |
| 717 | P096T | KIF7           | NM_198525    | c.C3326T | p.T1109M |
| 718 | P096T | MESP2          | NM_001039958 | c.G682A  | p.G228R  |
| 719 | P096T | BLM            | NM_000057    | c.C3415T | p.R1139X |
| 720 | P096T | TM2D3          | NM_025141    | c.C550T  | p.R184W  |
| 721 | P096T | TARSL2         | NM_152334    | c.G2093A | p.R698H  |
| 722 | P096T | RGS11          | NM_003834    | c.C1193T | p.A398V  |
| 723 | P096T | RAB40C         | NM_021168    | c.G751A  | p.G251S  |
| 724 | P096T | WDR24          | NM_032259    | c.G1789A | p.V597M  |
| 725 | P096T | TELO2          | NM_016111    | c.C937T  | p.P313S  |
| 726 | P096T | IFT140         | NM_014714    | c.C4184T | p.A1395V |
| 727 | P096T | RPL3L          | NM_005061    | c.C298T  | p.R100W  |
| 728 | P096T | NTHL1          | NM_002528    | c.G8T    | p.S3I    |
| 729 | P096T | ABCA3          | NM_001089    | c.G4327A | p.G1443R |
| 730 | P096T | TBC1D24        | NM_001199107 | c.G439A  | p.D147N  |
| 731 | P096T | FLYWCH1        | NM_020912    | c.G1958A | p.R653H  |
| 732 | P096T | ZNF213         | NM_001134655 | c.G554A  | p.R185H  |
| 733 | P096T | ZNF213         | NM_001134655 | c.G899A  | p.R300Q  |

Supplemental Tables for:

Oncogenic ALK Fusion and RRAS Mutation in KRAS mutation-negative Pancreatic Ductal Adenocarcinoma

Takashi Kohno et al.

|     |       |          |              |           |          |
|-----|-------|----------|--------------|-----------|----------|
| 734 | P096T | CREBBP   | NM_001079846 | c.C5206T  | p.R1736C |
| 735 | P096T | ADCY9    | NM_001116    | c.G3118A  | p.V1040M |
| 736 | P096T | ADCY9    | NM_001116    | c.G80A    | p.S27N   |
| 737 | P096T | TFAP4    | NM_003223    | c.C139T   | p.R47W   |
| 738 | P096T | VASN     | NM_138440    | c.C587T   | p.A196V  |
| 739 | P096T | ROGDI    | NM_024589    | c.C454T   | p.Q152X  |
| 740 | P096T | EMP2     | NM_001424    | c.G263A   | p.R88H   |
| 741 | P096T | ABCC6    | NM_001171    | c.G2428A  | p.V810M  |
| 742 | P096T | SMG1     | NM_015092    | c.G10123A | p.A3375T |
| 743 | P096T | SMG1     | NM_015092    | c.G8437A  | p.G2813R |
| 744 | P096T | UMOD     | NM_001008389 | c.C470T   | p.P157L  |
| 745 | P096T | ACSM2B   | NM_001105069 | c.C1457A  | p.P486H  |
| 746 | P096T | DNAH3    | NM_017539    | c.C9643T  | p.P3215S |
| 747 | P096T | EEF2K    | NM_013302    | c.C121A   | p.P41T   |
| 748 | P096T | CCDC101  | NM_138414    | c.G131A   | p.R44Q   |
| 749 | P096T | ATXN2L   | NM_007245    | c.G2468A  | p.R823H  |
| 750 | P096T | SH2B1    | NM_015503    | c.C1732T  | p.R578C  |
| 751 | P096T | NFATC2IP | NM_032815    | c.C632T   | p.T211M  |
| 752 | P096T | LAT      | NM_014387    | c.C562T   | p.R188X  |
| 753 | P096T | SEZ6L2   | NM_001243333 | c.G692A   | p.R231K  |
| 754 | P096T | ZNF48    | NM_001214907 | c.G515A   | p.R172H  |
| 755 | P096T | ZNF48    | NM_001214907 | c.G1136A  | p.R379H  |
| 756 | P096T | PRR14    | NM_024031    | c.C1066T  | p.R356X  |
| 757 | P096T | SETD1A   | NM_014712    | c.G3614A  | p.R1205Q |
| 758 | P096T | ZNF668   | NM_001172668 | c.G50A    | p.R17H   |
| 759 | P096T | PRSS36   | NM_001258290 | c.C805T   | p.R269W  |
| 760 | P096T | ZNF423   | NM_001271620 | c.A602G   | p.D201G  |
| 761 | P096T | HEATR3   | NM_182922    | c.C1090T  | p.Q364X  |
| 762 | P096T | SALL1    | NM_001127892 | c.C1775T  | p.S592F  |
| 763 | P096T | CHD9     | NM_025134    | c.C7798T  | p.R2600C |
| 764 | P096T | RPGRIP1L | NM_001127897 | c.C1945T  | p.R649X  |
| 765 | P096T | CES2     | NM_003869    | c.C1007T  | p.T336M  |
| 766 | P096T | TRADD    | NM_003789    | c.G361A   | p.G121S  |
| 767 | P096T | FBXL8    | NM_018378    | c.C635T   | p.A212V  |
| 768 | P096T | GFOD2    | NM_030819    | c.G1015T  | p.E339X  |
| 769 | P096T | RANBP10  | NM_020850    | c.G917A   | p.R306H  |
| 770 | P096T | NFAT5    | NM_006599    | c.C234T   | p.G78G   |
| 771 | P096T | CLEC18A  | NM_001136214 | c.G364A   | p.E122K  |
| 772 | P096T | CALB2    | NM_007088    | c.G557T   | p.S186I  |

Supplemental Tables for:  
Oncogenic ALK Fusion and RRAS Mutation in KRAS mutation-negative Pancreatic Ductal Adenocarcinoma  
Takashi Kohno et al.

|     |       |               |              |          |          |
|-----|-------|---------------|--------------|----------|----------|
| 773 | P096T | ZFHX3         | NM_001164766 | c.C4418A | p.P1473H |
| 774 | P096T | MON1B         | NM_014940    | c.C1141T | p.R381C  |
| 775 | P096T | NUDT7         | NM_001105663 | c.C232T  | p.R78C   |
| 776 | P096T | WWOX          | NM_016373    | c.G568A  | p.V190M  |
| 777 | P096T | USP10         | NM_005153    | c.C1232T | p.S411L  |
| 778 | P096T | COX4NB;EMC8   | NM_006067    | c.G550A  | p.V184M  |
| 779 | P096T | FOXL1         | NM_005250    | c.A377G  | p.D126G  |
| 780 | P096T | JPH3          | NM_020655    | c.C743T  | p.A248V  |
| 781 | P096T | CDT1          | NM_030928    | c.G1604A | p.R535H  |
| 782 | P096T | ACSF3         | NM_001127214 | c.G268A  | p.G90S   |
| 783 | P096T | CDH15         | NM_004933    | c.C1588T | p.R530W  |
| 784 | P096T | SLC22A31      | NM_001242757 | c.C73T   | p.R25C   |
| 785 | P096T | DPEP1         | NM_001128141 | c.G403A  | p.A135T  |
| 786 | P096T | BHLHA9        | NM_001164405 | c.G13A   | p.A5T    |
| 787 | P096T | MYO1C         | NM_001080779 | c.G931A  | p.V311I  |
| 788 | P096T | WDR81         | NM_001163673 | c.C410T  | p.A137V  |
| 789 | P096T | WDR81         | NM_001163673 | c.G491A  | p.R164Q  |
| 790 | P096T | CLUH;KIAA0664 | NM_015229    | c.C1783T | p.R595C  |
| 791 | P096T | SHPK;TRPV1    | NM_080706    | c.C544T  | p.R182W  |
| 792 | P096T | ZMYND15       | NM_032265    | c.C1673T | p.A558V  |
| 793 | P096T | CHRNE         | NM_000080    | c.G1262A | p.R421H  |
| 794 | P096T | SENP3         | NM_015670    | c.G796A  | p.A266T  |
| 795 | P096T | TP53          | NM_001126115 | c.C628T  | p.R210X  |
| 796 | P096T | TP53          | NM_001126115 | c.G337A  | p.G113S  |
| 797 | P096T | DNAH2         | NM_020877    | c.C7642T | p.R2548C |
| 798 | P096T | MYH3          | NM_002470    | c.T4856C | p.M1619T |
| 799 | P096T | COP3          | NM_001199125 | c.T737C  | p.V246A  |
| 800 | P096T | SLC5A10       | NM_001042450 | c.C379T  | p.R127C  |
| 801 | P096T | B9D1          | NM_015681    | c.G241A  | p.G81S   |
| 802 | P096T | ERAL1         | NM_005702    | c.A329T  | p.N110I  |
| 803 | P096T | ERAL1         | NM_005702    | c.G1289A | p.R430H  |
| 804 | P096T | SSH2          | NM_033389    | c.C4169T | p.A1390V |
| 805 | P096T | SSH2          | NM_033389    | c.G2653T | p.G885C  |
| 806 | P096T | SSH2          | NM_033389    | c.G2620A | p.E874K  |
| 807 | P096T | EFCAB5        | NM_001145053 | c.G3T    | p.M1I    |
| 808 | P096T | NF1           | NM_000267    | c.C4084T | p.R1362X |
| 809 | P096T | ZNF207        | NM_003457    | c.C581A  | p.P194H  |
| 810 | P096T | SLFN11        | NM_152270    | c.G1307A | p.R436Q  |
| 811 | P096T | RASL10B       | NM_033315    | c.G389T  | p.R130L  |

Supplemental Tables for:

Oncogenic ALK Fusion and RRAS Mutation in KRAS mutation-negative Pancreatic Ductal Adenocarcinoma

Takashi Kohno et al.

|     |       |          |              |          |          |
|-----|-------|----------|--------------|----------|----------|
| 812 | P096T | AATF     | NM_012138    | c.C1222T | p.R408X  |
| 813 | P096T | SRCIN1   | NM_025248    | c.G2375A | p.R792H  |
| 814 | P096T | WIPF2    | NM_133264    | c.C503T  | p.T168M  |
| 815 | P096T | KRT25    | NM_181534    | c.T842C  | p.L281P  |
| 816 | P096T | KRT39    | NM_213656    | c.G271T  | p.G91C   |
| 817 | P096T | KRTAP4-7 | NM_033061    | c.G365A  | p.R122H  |
| 818 | P096T | KRT37    | NM_003770    | c.G1001A | p.R334H  |
| 819 | P096T | KRT38    | NM_006771    | c.G388A  | p.A130T  |
| 820 | P096T | CCR10    | NM_016602    | c.G221A  | p.R74H   |
| 821 | P096T | WNK4     | NM_032387    | c.C1537T | p.R513W  |
| 822 | P096T | GRN      | NM_002087    | c.C626T  | p.P209L  |
| 823 | P096T | FAM171A2 | NM_198475    | c.C1156A | p.P386T  |
| 824 | P096T | ARHGAP27 | NM_199282    | c.C1535T | p.T512M  |
| 825 | P096T | GOSR2    | NM_004287    | c.G539A  | p.R180Q  |
| 826 | P096T | CDC27    | NM_001114091 | c.G2363A | p.R788H  |
| 827 | P096T | HOXB1    | NM_002144    | c.C139T  | p.R47C   |
| 828 | P096T | NGFR     | NM_002507    | c.G1220A | p.R407H  |
| 829 | P096T | LRRC59   | NM_018509    | c.C694T  | p.R232C  |
| 830 | P096T | MMD      | NM_012329    | c.C385T  | p.R129C  |
| 831 | P096T | MSI2     | NM_170721    | c.C614T  | p.A205V  |
| 832 | P096T | BZRAP1   | NM_024418    | c.G2872T | p.G958C  |
| 833 | P096T | BZRAP1   | NM_024418    | c.G1511A | p.G504D  |
| 834 | P096T | BRIP1    | NM_032043    | c.G2806T | p.E936X  |
| 835 | P096T | TANC2    | NM_025185    | c.G2264A | p.R755H  |
| 836 | P096T | DDX42    | NM_203499    | c.G277A  | p.A93T   |
| 837 | P096T | SLC16A6  | NM_004694    | c.C665T  | p.A222V  |
| 838 | P096T | FDXR     | NM_001258015 | c.G797A  | p.R266H  |
| 839 | P096T | NUP85    | NM_024844    | c.A704G  | p.D235G  |
| 840 | P096T | GALK1    | NM_000154    | c.G1090A | p.A364T  |
| 841 | P096T | TRIM65   | NM_001256124 | c.C1139T | p.P380L  |
| 842 | P096T | SPHK1    | NM_001142602 | c.G620A  | p.R207H  |
| 843 | P096T | C17orf99 | NM_001163075 | c.C119T  | p.P40L   |
| 844 | P096T | ENGASE   | NM_001042573 | c.C1984T | p.R662X  |
| 845 | P096T | HEXDC    | NM_173620    | c.G553A  | p.V185M  |
| 846 | P096T | FO XK2   | NM_004514    | c.G1789A | p.A597T  |
| 847 | P096T | ZNF750   | NM_024702    | c.G686T  | p.G229V  |
| 848 | P096T | USP14    | NM_001037334 | c.G1267A | p.V423I  |
| 849 | P096T | SMCHD1   | NM_015295    | c.C4565T | p.T1522M |
| 850 | P096T | ANKRD12  | NM_001083625 | c.G3541A | p.V1181I |



Supplemental Tables for:

Oncogenic ALK Fusion and RRAS Mutation in KRAS mutation-negative Pancreatic Ductal Adenocarcinoma

Takashi Kohno et al.

|     |       |                         |              |          |          |
|-----|-------|-------------------------|--------------|----------|----------|
| 851 | P096T | RALBP1                  | NM_006788    | c.G1744A | p.E582K  |
| 852 | P096T | PIEZO2                  | NM_022068    | c.G6118A | p.D2040N |
| 853 | P096T | CEP192                  | NM_032142    | c.A7132G | p.M2378V |
| 854 | P096T | ANKRD30B                | NM_001145029 | c.C430T  | p.H144Y  |
| 855 | P096T | GREB1L                  | NM_001142966 | c.G2788A | p.D930N  |
| 856 | P096T | LAMA3                   | NM_001127718 | c.G1492A | p.A498T  |
| 857 | P096T | MEP1B                   | NM_005925    | c.C315A  | p.D105E  |
| 858 | P096T | KLHL14                  | NM_020805    | c.A1502G | p.K501R  |
| 859 | P096T | DTNA                    | NM_001390    | c.G497A  | p.R166Q  |
| 860 | P096T | SLC39A6                 | NM_001099406 | c.G271A  | p.V91I   |
| 861 | P096T | FHOD3                   | NM_025135    | c.C4057T | p.R1353C |
| 862 | P096T | SMAD2                   | NM_001135937 | c.G308A  | p.R103H  |
| 863 | P096T | STARD6                  | NM_139171    | c.G146A  | p.R49H   |
| 864 | P096T | ZNF532                  | NM_018181    | c.C1265T | p.A422V  |
| 865 | P096T | TNFRSF11A               | NM_003839    | c.C1460T | p.T487M  |
| 866 | P096T | CDH7                    | NM_004361    | c.C356T  | p.T119M  |
| 867 | P096T | TSHZ1                   | NM_005786    | c.G740A  | p.R247H  |
| 868 | P096T | NFATC1                  | NM_172388    | c.C23T   | p.T8M    |
| 869 | P096T | HMHA1                   | NM_001258328 | c.G1030A | p.V344I  |
| 870 | P096T | STK11                   | NM_000455    | c.C662T  | p.P221L  |
| 871 | P096T | MBD3                    | NM_003926    | c.C304T  | p.R102C  |
| 872 | P096T | THOP1                   | NM_003249    | c.G284A  | p.R95Q   |
| 873 | P096T | GTF2F1                  | NM_002096    | c.G418A  | p.V140M  |
| 874 | P096T | ZNF358                  | NM_018083    | c.C958T  | p.R320C  |
| 875 | P096T | PNPLA6                  | NM_001166114 | c.G3185A | p.R1062Q |
| 876 | P096T | CAMSAP3                 | NM_020902    | c.G2951A | p.R984H  |
| 877 | P096T | STXBP2                  | NM_001127396 | c.A266G  | p.Q89R   |
| 878 | P096T | KANK3                   | NM_198471    | c.G2175T | p.Q725H  |
| 879 | P096T | KANK3                   | NM_198471    | c.C572T  | p.A191V  |
| 880 | P096T | P2RY11;PPAN;PPAN-P2RY11 | NM_002566    | c.C722T  | p.A241V  |
| 881 | P096T | KEAP1                   | NM_012289    | c.C541A  | p.P181T  |
| 882 | P096T | ATG4D                   | NM_032885    | c.G578A  | p.R193H  |
| 883 | P096T | ILF3                    | NM_012218    | c.C2235T | p.Y745Y  |
| 884 | P096T | SMARCA4                 | NM_001128845 | c.G3575A | p.R1192H |
| 885 | P096T | SMARCA4                 | NM_001128845 | c.G3694A | p.G1232S |
| 886 | P096T | DOCK6                   | NM_020812    | c.C2828T | p.A943V  |
| 887 | P096T | RNASEH2A                | NM_006397    | c.C452T  | p.A151V  |
| 888 | P096T | MAST1                   | NM_014975    | c.C4391T | p.A1464V |
| 889 | P096T | CD97                    | NM_001784    | c.T1633C | p.Y545H  |

Supplemental Tables for:

Oncogenic ALK Fusion and RRAS Mutation in KRAS mutation-negative Pancreatic Ductal Adenocarcinoma

Takashi Kohno et al.

|     |       |                      |              |           |          |
|-----|-------|----------------------|--------------|-----------|----------|
| 890 | P096T | EPHX3                | NM_024794    | c.C555A   | p.Y185X  |
| 891 | P096T | BRD4                 | NM_058243    | c.C3178T  | p.R1060C |
| 892 | P096T | OR10H2               | NM_013939    | c.T134C   | p.I45T   |
| 893 | P096T | CYP4F2               | NM_001082    | c.C1448G  | p.A483G  |
| 894 | P096T | CPAMD8               | NM_015692    | c.G2095A  | p.V699M  |
| 895 | P096T | BABAM1;CTD-2278110.6 | NM_001033549 | c.G367C   | p.V123L  |
| 896 | P096T | CTD-2521M24.10;NXNL1 | NM_138454    | c.G448A   | p.A150T  |
| 897 | P096T | SLC27A1              | NM_198580    | c.C767A   | p.P256H  |
| 898 | P096T | FCHO1                | NM_001161359 | c.A566G   | p.N189S  |
| 899 | P096T | JAK3                 | NM_000215    | c.C224T   | p.T75M   |
| 900 | P096T | PIK3R2               | NM_005027    | c.C1889T  | p.T630M  |
| 901 | P096T | ISYNA1               | NM_001253389 | c.G797A   | p.R266H  |
| 902 | P096T | ZNF208               | NM_007153    | c.G620A   | p.G207D  |
| 903 | P096T | ZNF681               | NM_138286    | c.A1685G  | p.Y562C  |
| 904 | P096T | SBSN                 | NM_001166034 | c.G650A   | p.G217D  |
| 905 | P096T | ATP4A                | NM_000704    | c.G1372A  | p.V458M  |
| 906 | P096T | MLL4;WBP7            | NM_014727    | c.C4622T  | p.A1541V |
| 907 | P096T | PRODH2               | NM_021232    | c.G1499A  | p.R500Q  |
| 908 | P096T | PRODH2               | NM_021232    | c.C590A   | p.A197D  |
| 909 | P096T | ZFP82                | NM_133466    | c.G1423A  | p.E475K  |
| 910 | P096T | HKR1                 | NM_181786    | c.C1387T  | p.H463Y  |
| 911 | P096T | RYR1                 | NM_000540    | c.G9091A  | p.A3031T |
| 912 | P096T | LRFN1                | NM_020862    | c.C77T    | p.A26V   |
| 913 | P096T | DYRK1B               | NM_004714    | c.G301A   | p.V101M  |
| 914 | P096T | FCGBP                | NM_003890    | c.C15220T | p.R5074C |
| 915 | P096T | MAP3K10              | NM_002446    | c.C1357T  | p.R453C  |
| 916 | P096T | MAP3K10              | NM_002446    | c.C2222T  | p.A741V  |
| 917 | P096T | ADCK4                | NM_001142555 | c.C1429T  | p.R477C  |
| 918 | P096T | EXOSC5               | NM_020158    | c.C568T   | p.R190W  |
| 919 | P096T | ERF                  | NM_006494    | c.T1117C  | p.S373P  |
| 920 | P096T | MEGF8                | NM_001410    | c.G6569A  | p.R2190H |
| 921 | P096T | PSG9                 | NM_002784    | c.G1051A  | p.D351N  |
| 922 | P096T | ZNF575               | NM_174945    | c.G164A   | p.R55Q   |
| 923 | P096T | ZNF575               | NM_174945    | c.G434A   | p.R145H  |
| 924 | P096T | PLAUR                | NM_001005376 | c.G392A   | p.R131Q  |
| 925 | P096T | ZNF283               | NM_181845    | c.G1661A  | p.R554H  |
| 926 | P096T | ZNF233               | NM_001207005 | c.A857G   | p.H286R  |
| 927 | P096T | BCAM                 | NM_001013257 | c.G1739A  | p.R580H  |
| 928 | P096T | CLPTM1               | NM_001294    | c.G1625A  | p.R542H  |

Supplemental Tables for:

Oncogenic ALK Fusion and RRAS Mutation in KRAS mutation-negative Pancreatic Ductal Adenocarcinoma

Takashi Kohno et al.

|     |       |                   |              |          |          |
|-----|-------|-------------------|--------------|----------|----------|
| 929 | P096T | GEMIN7            | NM_001007269 | c.C46T   | p.R16W   |
| 930 | P096T | NKPD1             | NM_198478    | c.G2222A | p.R741H  |
| 931 | P096T | DMWD              | NM_004943    | c.C842T  | p.A281V  |
| 932 | P096T | RSPH6A            | NM_030785    | c.G1722T | p.E574D  |
| 933 | P096T | PRKD2             | NM_001079882 | c.G883A  | p.A295T  |
| 934 | P096T | LMTK3             | NM_001080434 | c.G2552A | p.R851Q  |
| 935 | P096T | CCDC155           | NM_144688    | c.C1540T | p.R514W  |
| 936 | P096T | SLC17A7           | NM_020309    | c.G1130A | p.R377H  |
| 937 | P096T | ALDH16A1          | NM_001145396 | c.G2039A | p.R680H  |
| 938 | P096T | NR1H2             | NM_001256647 | c.G788A  | p.R263Q  |
| 939 | P096T | SHANK1            | NM_016148    | c.G4447A | p.E1483K |
| 940 | P096T | ACPT              | NM_033068    | c.C691A  | p.L231M  |
| 941 | P096T | ZNF613            | NM_001031721 | c.G1259A | p.R420H  |
| 942 | P096T | ZNF841            | NM_001136499 | c.A1718G | p.K573R  |
| 943 | P096T | ZNF836            | NM_001102657 | c.G1844A | p.C615Y  |
| 944 | P096T | ZNF468            | NM_001008801 | c.C334T  | p.P112S  |
| 945 | P096T | CACNG7            | NM_031896    | c.C199T  | p.R67W   |
| 946 | P096T | LILRB2            | NM_001080978 | c.C313T  | p.R105W  |
| 947 | P096T | LILRB4            | NM_001081438 | c.G851A  | p.R284H  |
| 948 | P096T | U2AF2             | NM_001012478 | c.G511A  | p.A171T  |
| 949 | P096T | NLRP5             | NM_153447    | c.C3364T | p.R1122W |
| 950 | P096T | PEG3              | NM_001146186 | c.C1510T | p.R504C  |
| 951 | P096T | ZNF551            | NM_001270938 | c.T329C  | p.M110T  |
| 952 | P096T | SCRT2             | NM_033129    | c.C599T  | p.A200V  |
| 953 | P096T | STK35             | NM_080836    | c.C751A  | p.L251I  |
| 954 | P096T | IDH3B             | NM_006899    | c.G1076A | p.R359Q  |
| 955 | P096T | C20ORF141;TMEM239 | NM_001167670 | c.C214T  | p.L72L   |
| 956 | P096T | C20orf194         | NM_001009984 | c.G1165A | p.A389T  |
| 957 | P096T | CDC25B            | NM_021872    | c.C1354T | p.R452C  |
| 958 | P096T | ISM1              | NM_080826    | c.C740T  | p.A247V  |
| 959 | P096T | SEL1L2            | NM_001271539 | c.C755T  | p.T252I  |
| 960 | P096T | PCSK2             | NM_001201529 | c.G1198T | p.G400C  |
| 961 | P096T | NINL              | NM_025176    | c.G2002A | p.E668K  |
| 962 | P096T | HCK               | NM_001172129 | c.G820T  | p.G274W  |
| 963 | P096T | PLAGL2            | NM_002657    | c.C1412A | p.P471H  |
| 964 | P096T | GGT7              | NM_178026    | c.A187G  | p.K63E   |
| 965 | P096T | ACSS2             | NM_001242393 | c.G1001A | p.R334Q  |
| 966 | P096T | MYH7B             | NM_020884    | c.G4826A | p.R1609Q |
| 967 | P096T | NFS1              | NM_001198989 | c.C1141T | p.R381C  |

Supplemental Tables for:  
Oncogenic ALK Fusion and RRAS Mutation in KRAS mutation-negative Pancreatic Ductal Adenocarcinoma  
Takashi Kohno et al.

|      |       |                   |              |           |          |
|------|-------|-------------------|--------------|-----------|----------|
| 968  | P096T | KIAA1755          | NM_001029864 | c.G3415A  | p.G1139S |
| 969  | P096T | RALGAPB           | NM_020336    | c.G3326A  | p.R1109H |
| 970  | P096T | SLC32A1           | NM_080552    | c.G223A   | p.A75T   |
| 971  | P096T | PLCG1             | NM_002660    | c.C727T   | p.R243W  |
| 972  | P096T | LPIN3             | NM_022896    | c.G2348A  | p.R783H  |
| 973  | P096T | WFDC2             | NM_006103    | c.C203T   | p.T68I   |
| 974  | P096T | SLC12A5           | NM_001134771 | c.C2422A  | p.H808N  |
| 975  | P096T | EYA2              | NM_172110    | c.A1298G  | p.K433R  |
| 976  | P096T | CSTF1             | NM_001033521 | c.G1067A  | p.R356Q  |
| 977  | P096T | GNAS              | NM_001077489 | c.G557A   | p.R186H  |
| 978  | P096T | PPP1R3D           | NM_006242    | c.G863A   | p.R288H  |
| 979  | P096T | LAMA5             | NM_005560    | c.C10391T | p.P3464L |
| 980  | P096T | LAMA5             | NM_005560    | c.G6978A  | p.M2326I |
| 981  | P096T | DIDO1             | NM_001193369 | c.C859T   | p.R287C  |
| 982  | P096T | COL20A1           | NM_020882    | c.G928A   | p.V310I  |
| 983  | P096T | EEF1A2            | NM_001958    | c.G793T   | p.G265C  |
| 984  | P096T | HELZ2;PRIC285     | NM_033405    | c.C2710T  | p.R904C  |
| 985  | P096T | ABHD16B;C20ORF135 | NM_080622    | c.G301A   | p.A101T  |
| 986  | P096T | ABHD16B           | NM_080622    | c.C359T   | p.T120M  |
| 987  | P096T | TPD52L2           | NM_001243891 | c.C254T   | p.S85F   |
| 988  | P096T | ZNF512B           | NM_020713    | c.G1004A  | p.R335H  |
| 989  | P096T | NPBWR2            | NM_005286    | c.G767A   | p.R256Q  |
| 990  | P096T | MRPL39            | NM_080794    | c.C1001T  | p.T334M  |
| 991  | P096T | ADAMTSS           | NM_007038    | c.G1210A  | p.A404T  |
| 992  | P096T | OLIG1             | NM_138983    | c.T452C   | p.I151T  |
| 993  | P096T | HLCS              | NM_000411    | c.G886A   | p.V296I  |
| 994  | P096T | KCNJ6             | NM_002240    | c.T280A   | p.L94M   |
| 995  | P096T | DSCAM             | NM_001271534 | c.C598T   | p.R200W  |
| 996  | P096T | MX2               | NM_002463    | c.G1217A  | p.R406H  |
| 997  | P096T | UMODL1            | NM_001199527 | c.C2536T  | p.R846W  |
| 998  | P096T | CBS               | NM_000071    | c.C133T   | p.R45W   |
| 999  | P096T | SLC19A1           | NM_001205207 | c.G802A   | p.A268T  |
| 1000 | P096T | COL6A2            | NM_001849    | c.C1402T  | p.R468X  |
| 1001 | P096T | FTCD              | NM_006657    | c.G889C   | p.E297Q  |
| 1002 | P096T | LSS               | NM_001145437 | c.G107A   | p.R36H   |
| 1003 | P096T | PCNT              | NM_006031    | c.G2557A  | p.A853T  |
| 1004 | P096T | PCNT              | NM_006031    | c.G5468A  | p.R1823H |
| 1005 | P096T | SLC25A1           | NM_001256534 | c.G638A   | p.R213H  |
| 1006 | P096T | MED15             | NM_001003891 | c.G430A   | p.V144M  |

Supplemental Tables for:  
Oncogenic ALK Fusion and RRAS Mutation in KRAS mutation-negative Pancreatic Ductal Adenocarcinoma  
Takashi Kohno et al.

|      |       |               |              |          |          |
|------|-------|---------------|--------------|----------|----------|
| 1007 | P096T | PI4KA         | NM_002650    | c.C341A  | p.A114D  |
| 1008 | P096T | ADRBK2        | NM_005160    | c.G1421A | p.R474Q  |
| 1009 | P096T | RFPL1         | NM_021026    | c.G360A  | p.M120I  |
| 1010 | P096T | MORC2         | NM_014941    | c.G1423A | p.E475K  |
| 1011 | P096T | SMTN          | NM_001207017 | c.G1810A | p.G604R  |
| 1012 | P096T | RNF185        | NM_152267    | c.G361T  | p.G121W  |
| 1013 | P096T | SFI1          | NM_001258325 | c.C1111T | p.R371W  |
| 1014 | P096T | CSF2RB        | NM_000395    | c.G674A  | p.R225H  |
| 1015 | P096T | BAIAP2L2      | NM_025045    | c.G685A  | p.A229T  |
| 1016 | P096T | CBX6          | NM_014292    | c.G910A  | p.A304T  |
| 1017 | P096T | PNPLA5        | NM_001177675 | c.C218T  | p.S73L   |
| 1018 | P096T | PKDREJ        | NM_006071    | c.G5299A | p.V1767M |
| 1019 | P096T | PKDREJ        | NM_006071    | c.C5230T | p.R1744C |
| 1020 | P096T | PKDREJ        | NM_006071    | c.C2465A | p.S822Y  |
| 1021 | P096T | MOV10L1       | NM_001164104 | c.A644G  | p.Y215C  |
| 1022 | P096T | MOV10L1       | NM_001164104 | c.G751A  | p.A251T  |
| 1023 | P096T | KLHDC7B       | NM_138433    | c.G487A  | p.G163S  |
| 1024 | P096T | SHANK3        | NM_033517    | c.G1627A | p.D543N  |
| 1025 | P096T | SHANK3        | NM_033517    | c.G1718A | p.R573Q  |
| 1026 | P096T | ARSH          | NM_001011719 | c.G326A  | p.R109H  |
| 1027 | P096T | NLGN4X;NLGN4Y | NM_020742    | c.C1699A | p.Q567K  |
| 1028 | P096T | TBL1X         | NM_001139467 | c.G1249A | p.A417T  |
| 1029 | P096T | FRMPD4        | NM_014728    | c.G1423A | p.E475K  |
| 1030 | P096T | PTCHD1        | NM_173495    | c.G52A   | p.G18S   |
| 1031 | P096T | FAM47A        | NM_203408    | c.C670T  | p.R224C  |
| 1032 | P096T | RPGR          | NM_001034853 | c.A1979C | p.E660A  |
| 1033 | P096T | USP11         | NM_004651    | c.G1378A | p.G460S  |
| 1034 | P096T | OTUD5         | NM_001136157 | c.G821A  | p.R274Q  |
| 1035 | P096T | CCDC120       | NM_001163321 | c.G1366A | p.A456T  |
| 1036 | P096T | SYP           | NM_003179    | c.G439T  | p.A147S  |
| 1037 | P096T | FOXP3         | NM_014009    | c.G247A  | p.G83R   |
| 1038 | P096T | CLCN5         | NM_000084    | c.G1111A | p.A371T  |
| 1039 | P096T | AKAP4         | NM_003886    | c.A235G  | p.I79V   |
| 1040 | P096T | HUWE1         | NM_031407    | c.C4876T | p.R1626C |
| 1041 | P096T | TRO           | NM_001271183 | c.G1532A | p.G511D  |
| 1042 | P096T | USP51         | NM_201286    | c.A116C  | p.E39A   |
| 1043 | P096T | HEPH          | NM_001130860 | c.T625C  | p.C209R  |
| 1044 | P096T | STARD8        | NM_001142504 | c.G2521A | p.V841M  |
| 1045 | P096T | ARR3          | NM_004312    | c.T1060C | p.S354P  |

Supplemental Tables for:

Oncogenic ALK Fusion and RRAS Mutation in KRAS mutation-negative Pancreatic Ductal Adenocarcinoma

Takashi Kohno et al.

|      |       |                |              |          |          |
|------|-------|----------------|--------------|----------|----------|
| 1046 | P096T | DLG3           | NM_021120    | c.G830A  | p.R277Q  |
| 1047 | P096T | GJB1           | NM_000166    | c.G548A  | p.R183H  |
| 1048 | P096T | ACRC           | NM_052957    | c.C1456T | p.R486C  |
| 1049 | P096T | SLC16A2        | NM_006517    | c.G965A  | p.R322H  |
| 1050 | P096T | POF1B          | NM_024921    | c.G1427A | p.C476Y  |
| 1051 | P096T | CHM            | NM_000390    | c.G37A   | p.V13I   |
| 1052 | P096T | TGIF2LX        | NM_138960    | c.G460A  | p.V154I  |
| 1053 | P096T | PCDH19         | NM_001105243 | c.C619T  | p.R207X  |
| 1054 | P096T | TEX13A         | NM_031274    | c.G1175A | p.R392Q  |
| 1055 | P096T | ACSL4          | NM_004458    | c.C1231T | p.R411X  |
| 1056 | P096T | ALG13          | NM_001099922 | c.G1988A | p.R663Q  |
| 1057 | P096T | LONRF3         | NM_001031855 | c.G569A  | p.R190Q  |
| 1058 | P096T | SLC25A43       | NM_145305    | c.G398A  | p.R133Q  |
| 1059 | P096T | RHOXF2;RHOXF2B | NM_001099685 | c.G464A  | p.R155H  |
| 1060 | P096T | XIAP           | NM_001167    | c.C664T  | p.R222X  |
| 1061 | P096T | LOC100129520   | NM_001195272 | c.T1736C | p.I579T  |
| 1062 | P096T | ARHGEF6        | NM_004840    | c.C1783T | p.R595X  |
| 1063 | P096T | MAGEC1         | NM_005462    | c.T718C  | p.S240P  |
| 1064 | P096T | FMR1           | NM_001185076 | c.A1196G | p.H399R  |
| 1065 | P096T | MTM1           | NM_000252    | c.C1666T | p.R556C  |
| 1066 | P096T | MTMR1          | NM_003828    | c.G1028A | p.R343Q  |
| 1067 | P096T | SLC6A8         | NM_001142805 | c.G1042A | p.V348M  |
| 1068 | P096T | RENBP          | NM_002910    | c.G239A  | p.R80H   |
| 1069 | P096T | FLNA           | NM_001456    | c.G5116C | p.A1706P |
| 1070 | P096T | PLXNA3         | NM_017514    | c.C932T  | p.P311L  |
